# Supplementary material
Source: PubMed Central journal article supplement (PMC7335734)
Supplement: mmc1.pdf [file mmc1.pdf]

## **Supplemental Information**

### **Highly Efficient Gene Editing of Cystic Fibrosis Patient-Derived Airway Basal Cells Results in Functional CFTR Correction**

**Shingo Suzuki, Ana M. Crane, Varada Anirudhan, Cristina Barilla, Nadine Matthias, Scott H. Randell, Andras Rab, Eric J. Sorscher, Jenny L. Kerschner, Shiyi Yin, Ann Harris, Matthew Mendel, Kenneth Kim, Lei Zhang, Anthony Conway, and Brian R. Davis**

**Fig. S1**

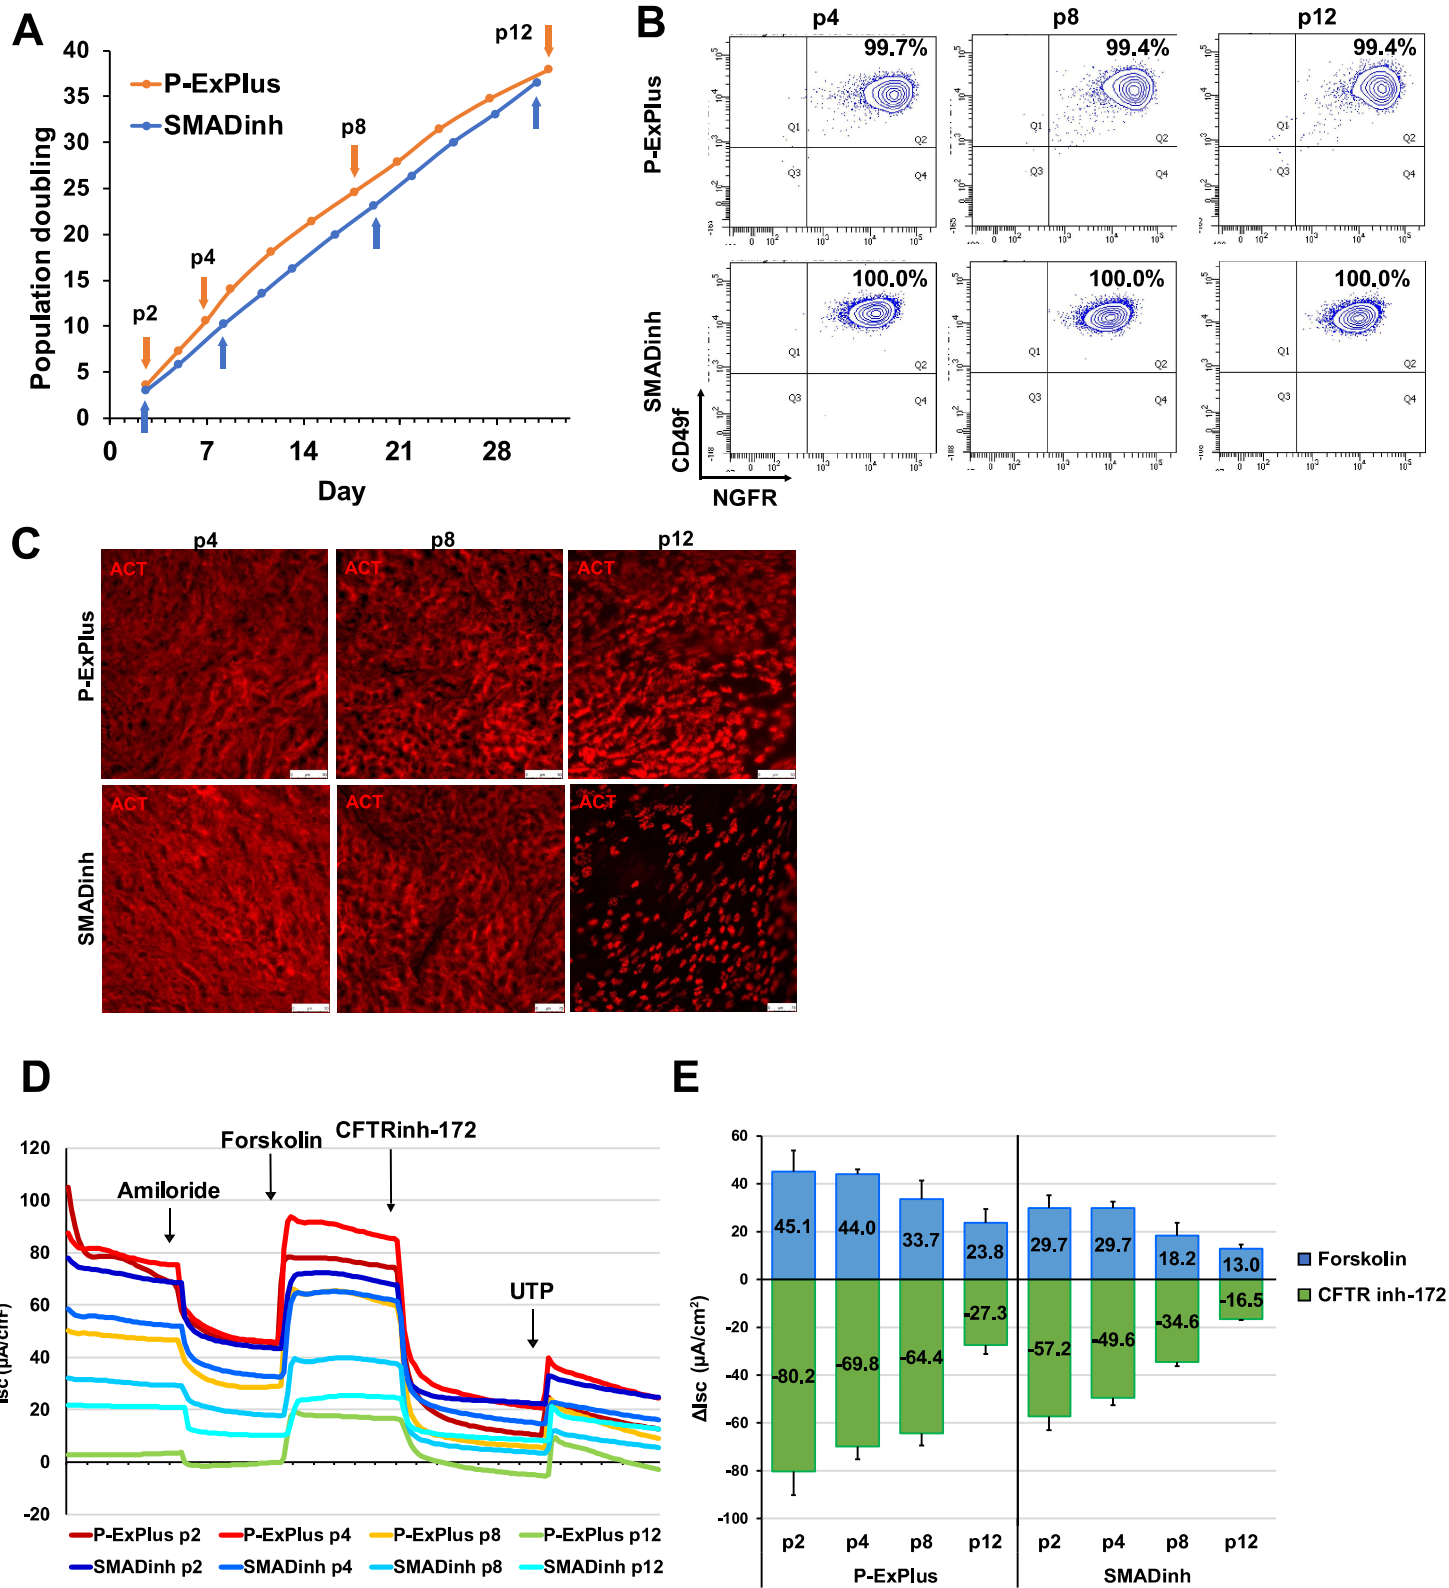

**Fig. S2**

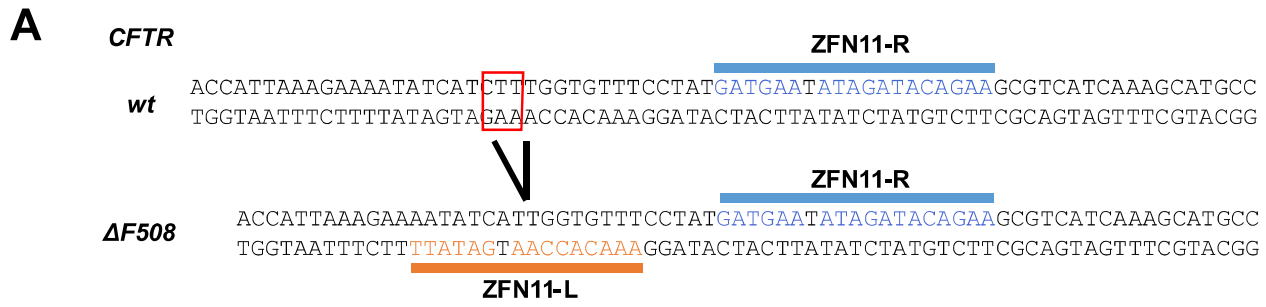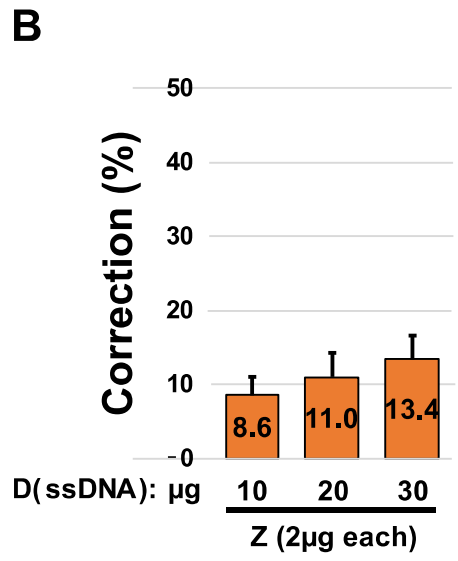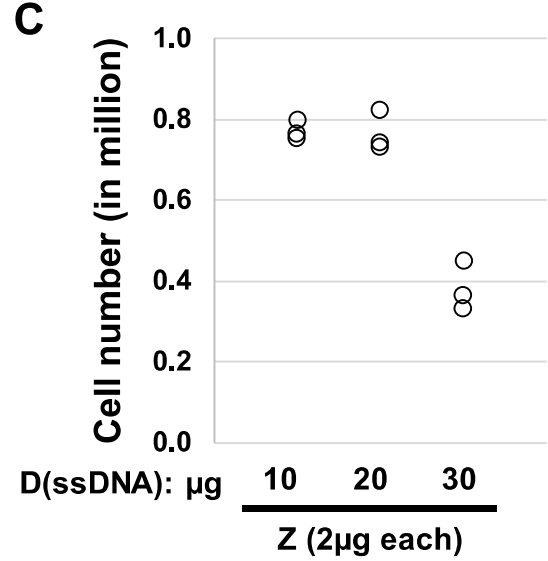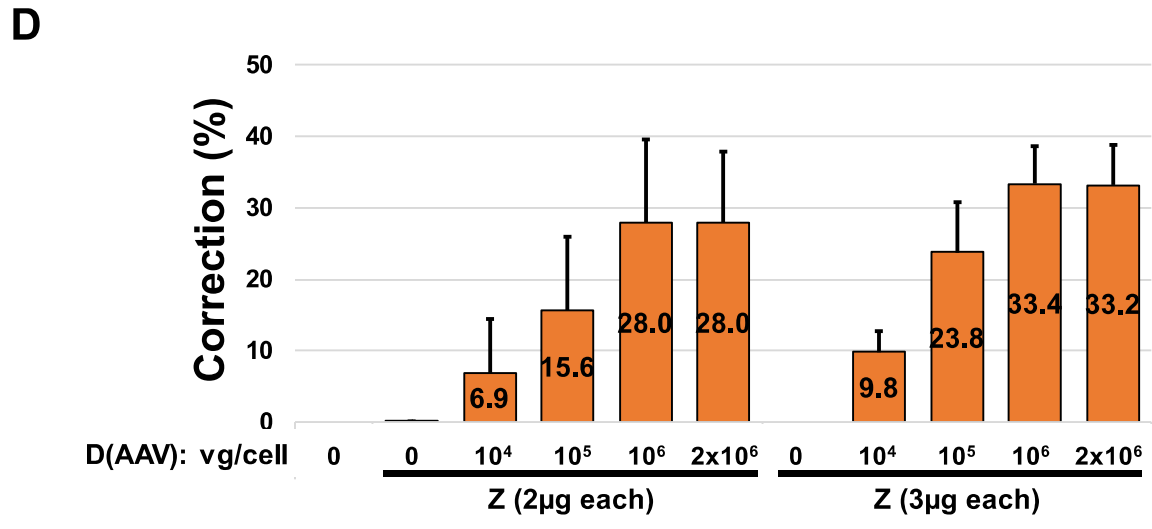

Fig. S3

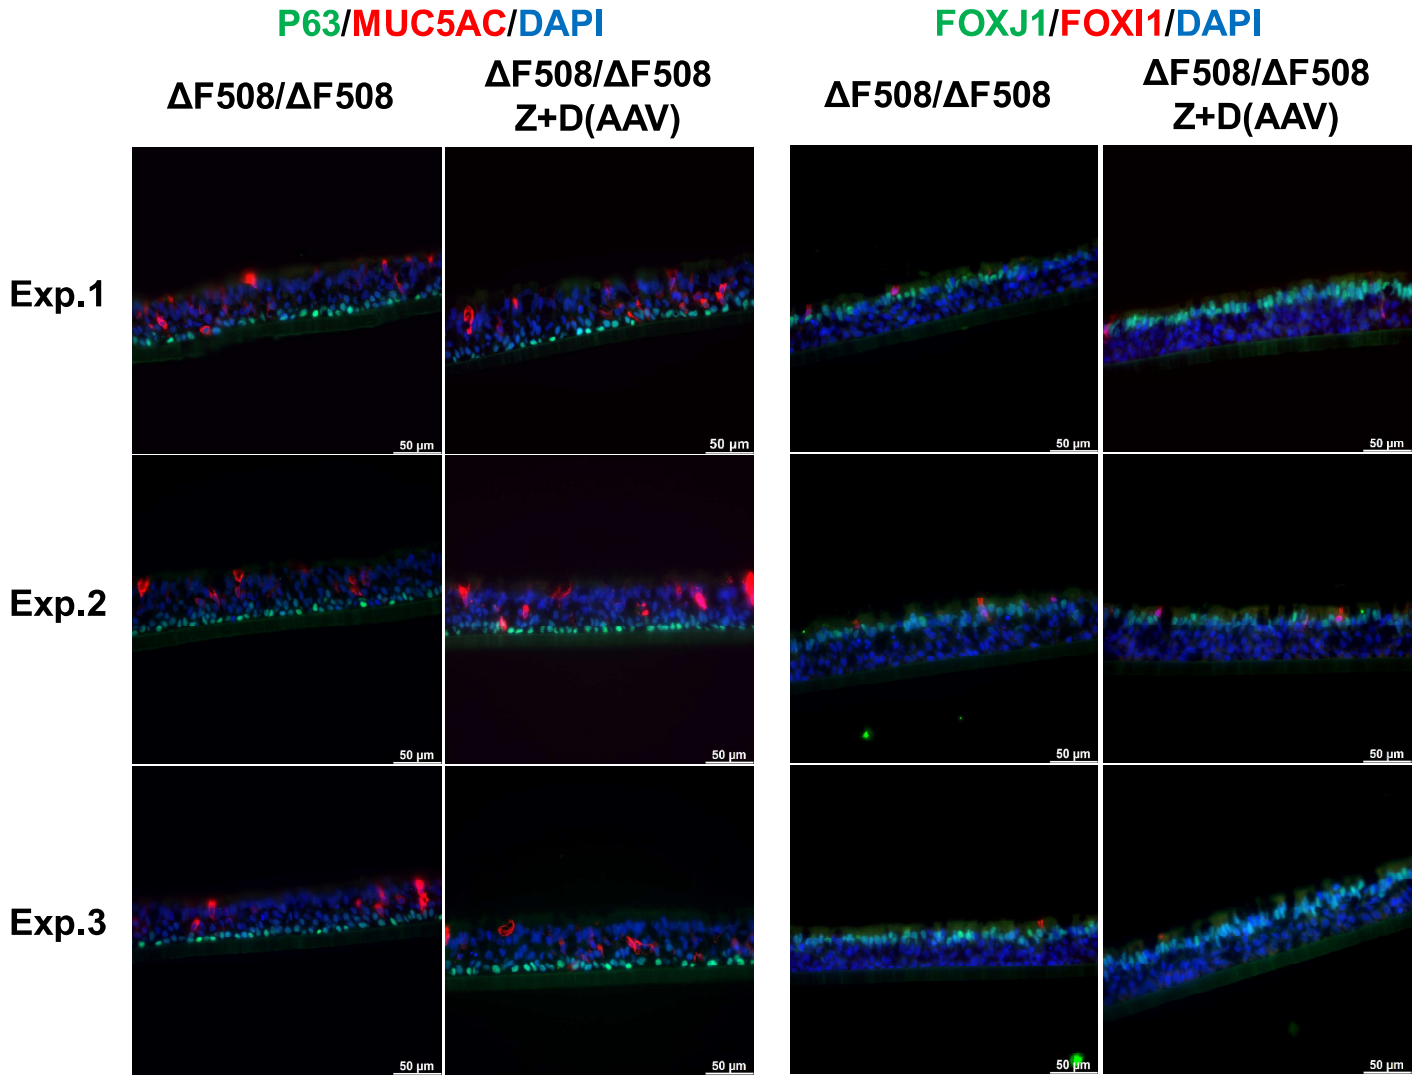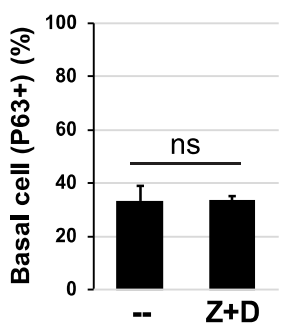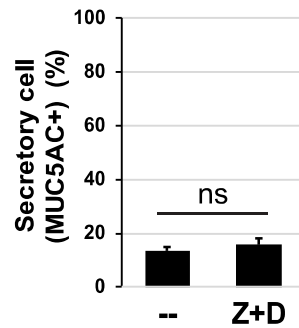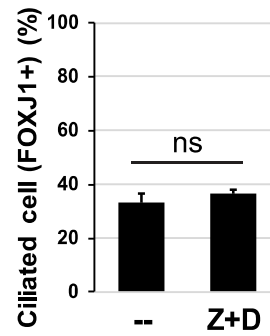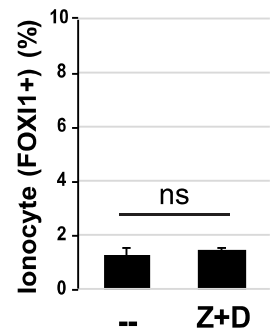

Fig. S4

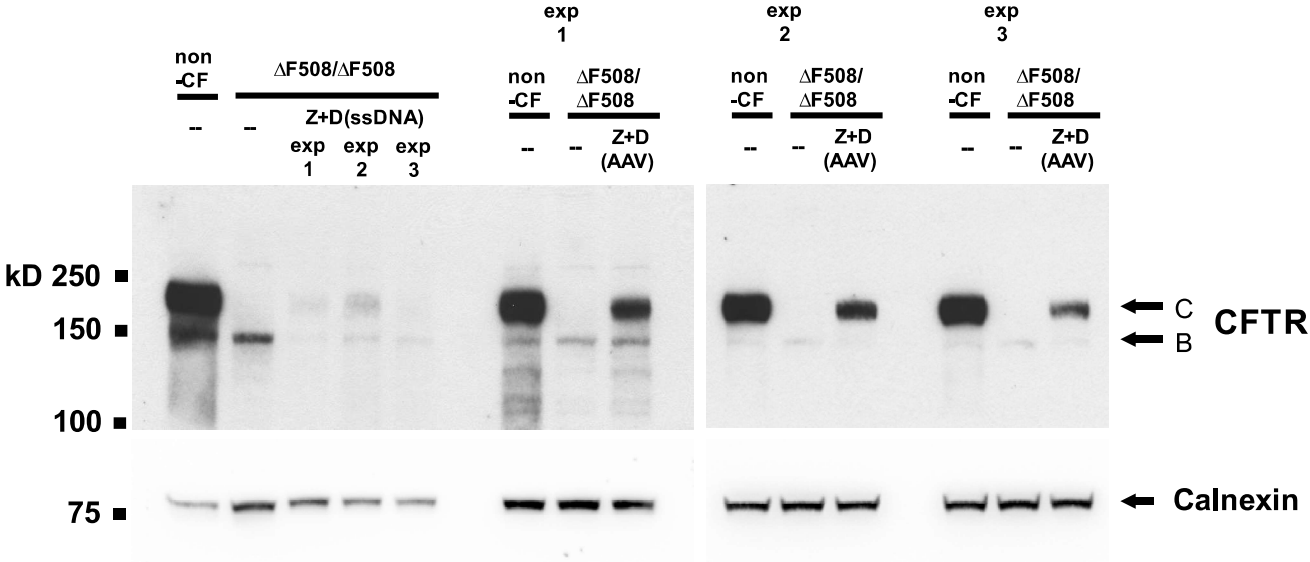

**Fig. S5**

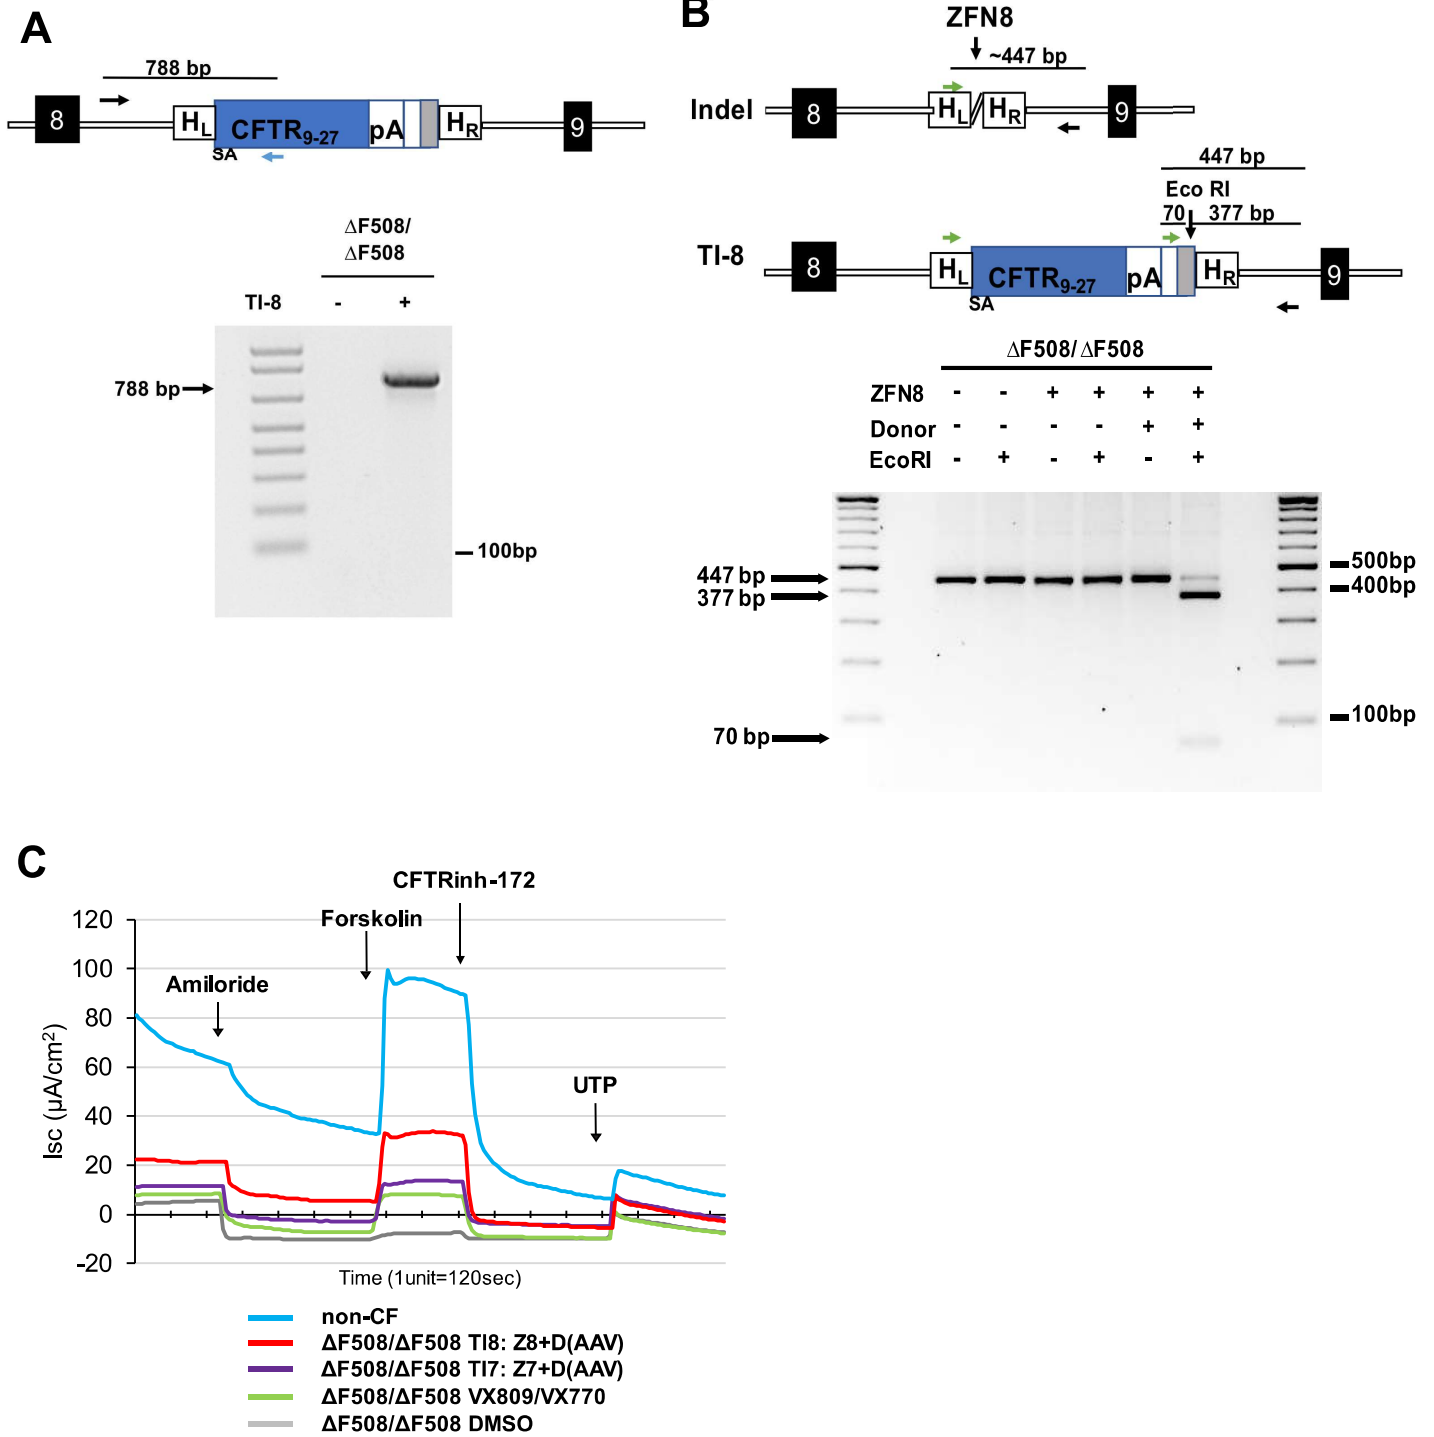

**Fig. S6**

**A**

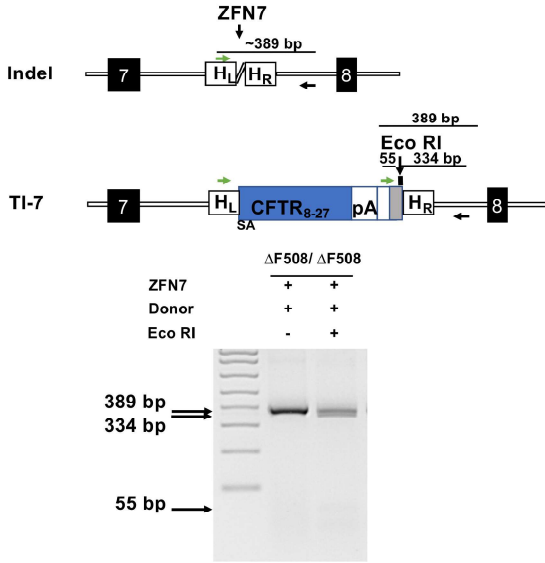

**B**

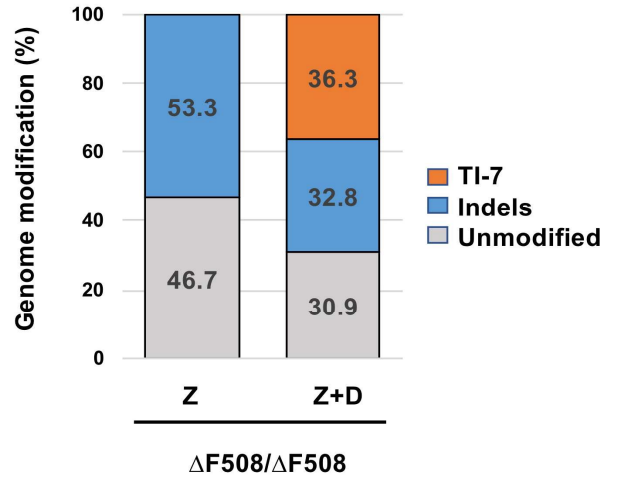

**C**

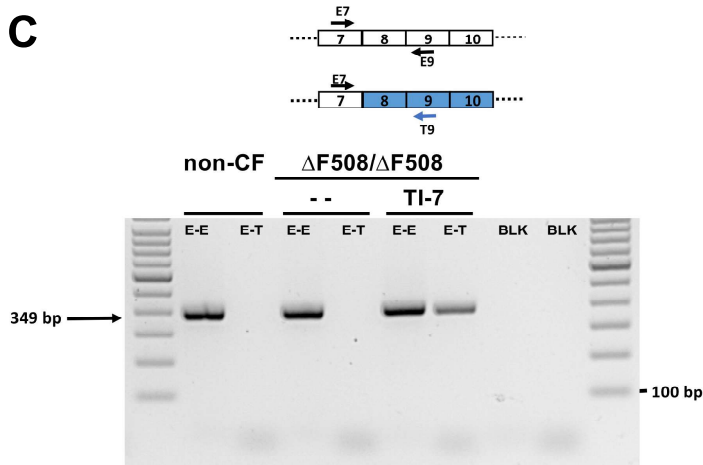

**D**

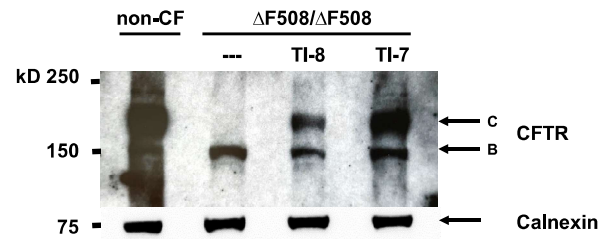

**E**

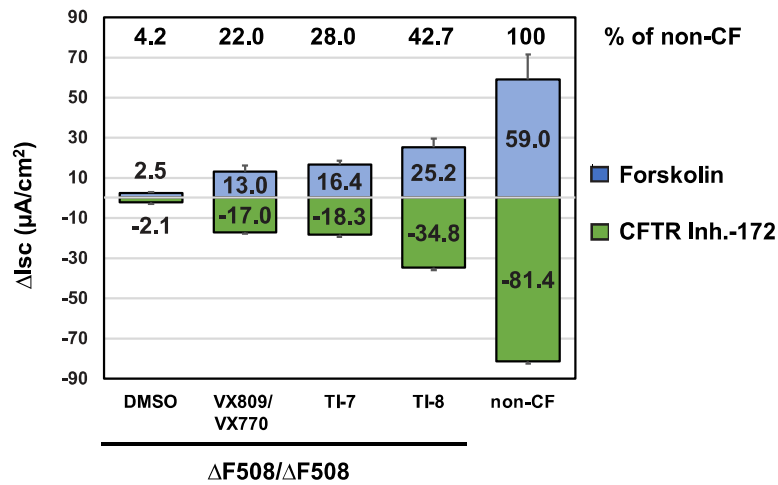

**Fig. S7**

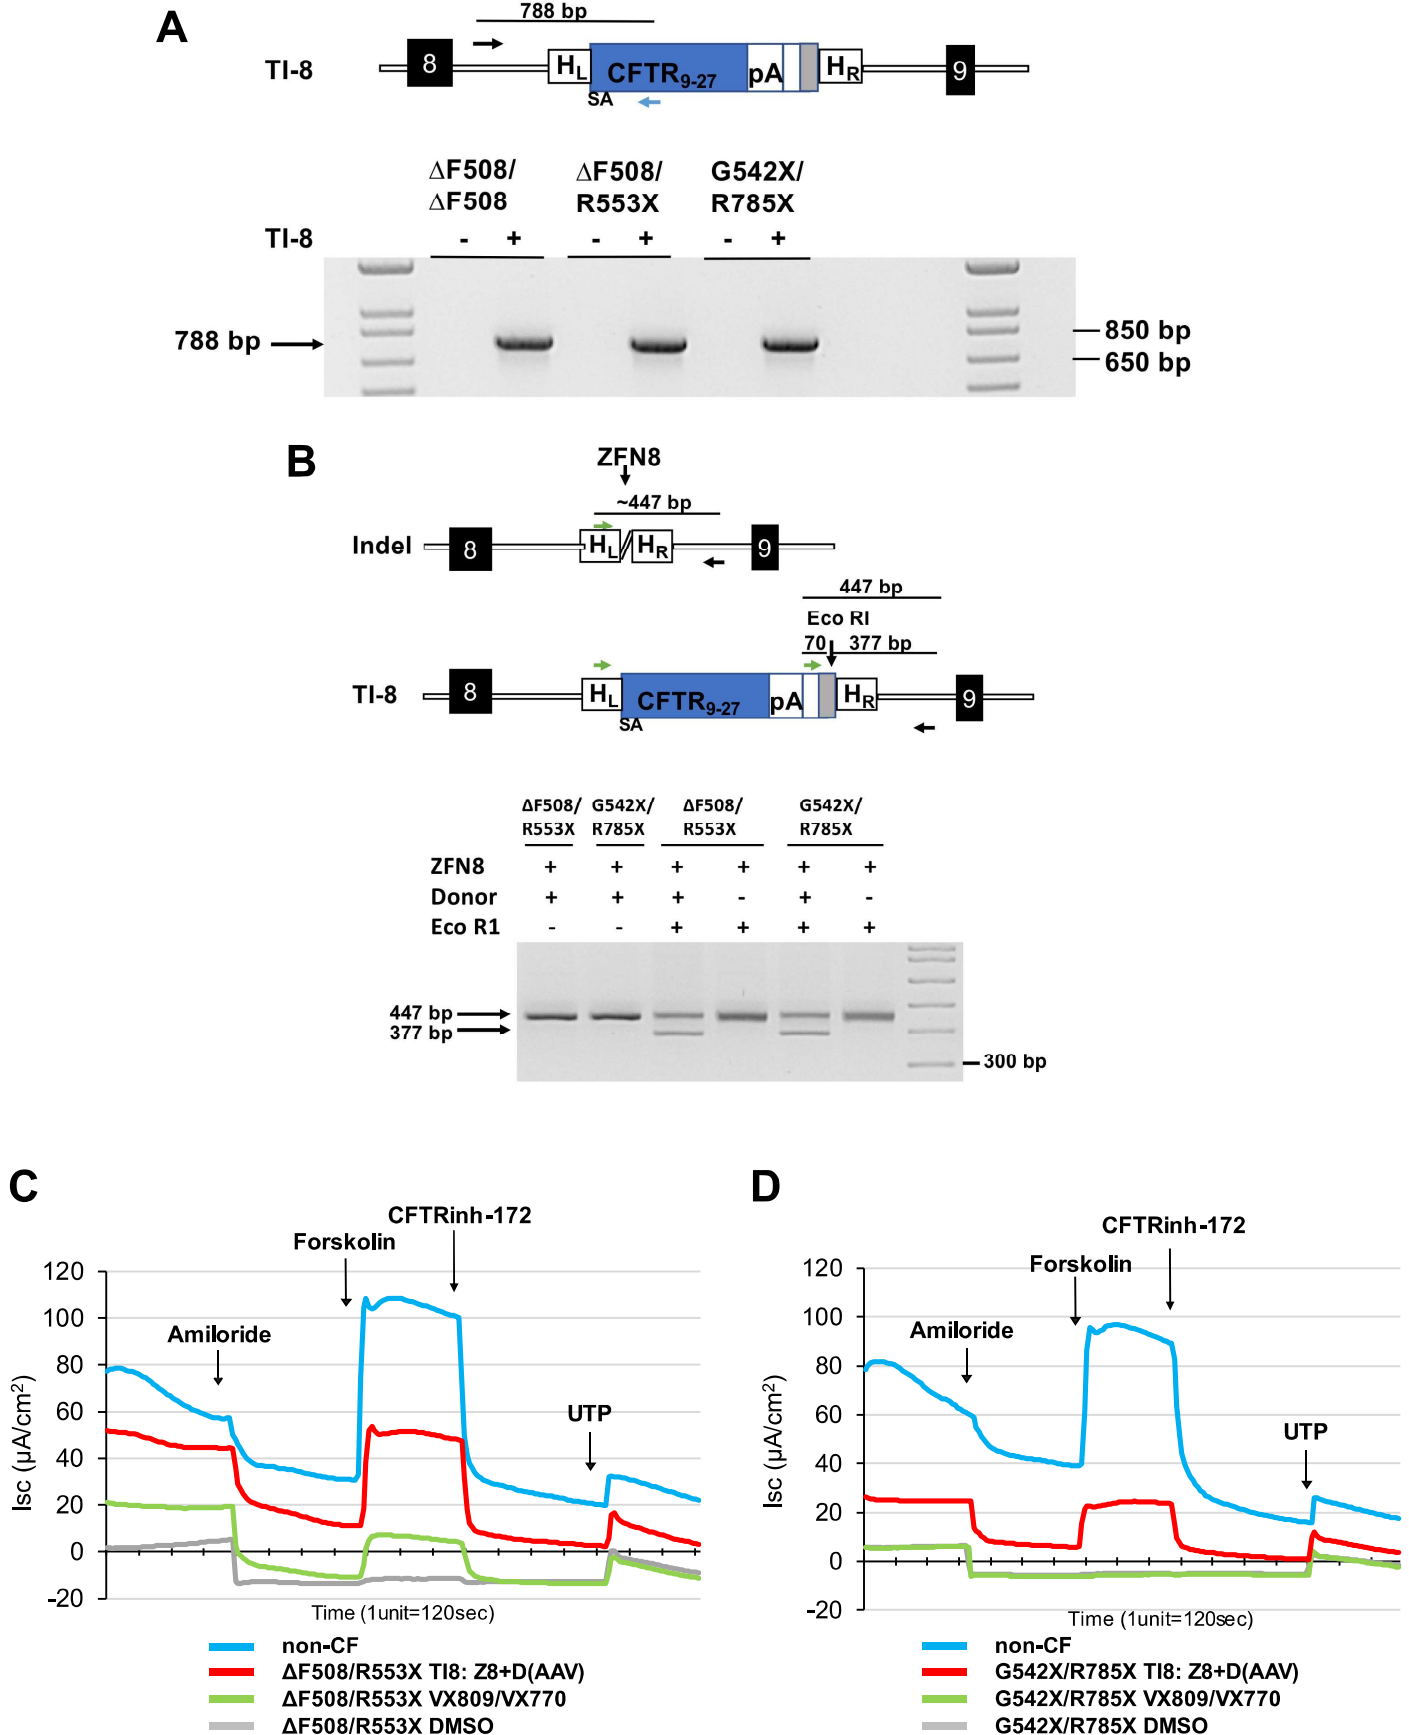



**Fig. S8**

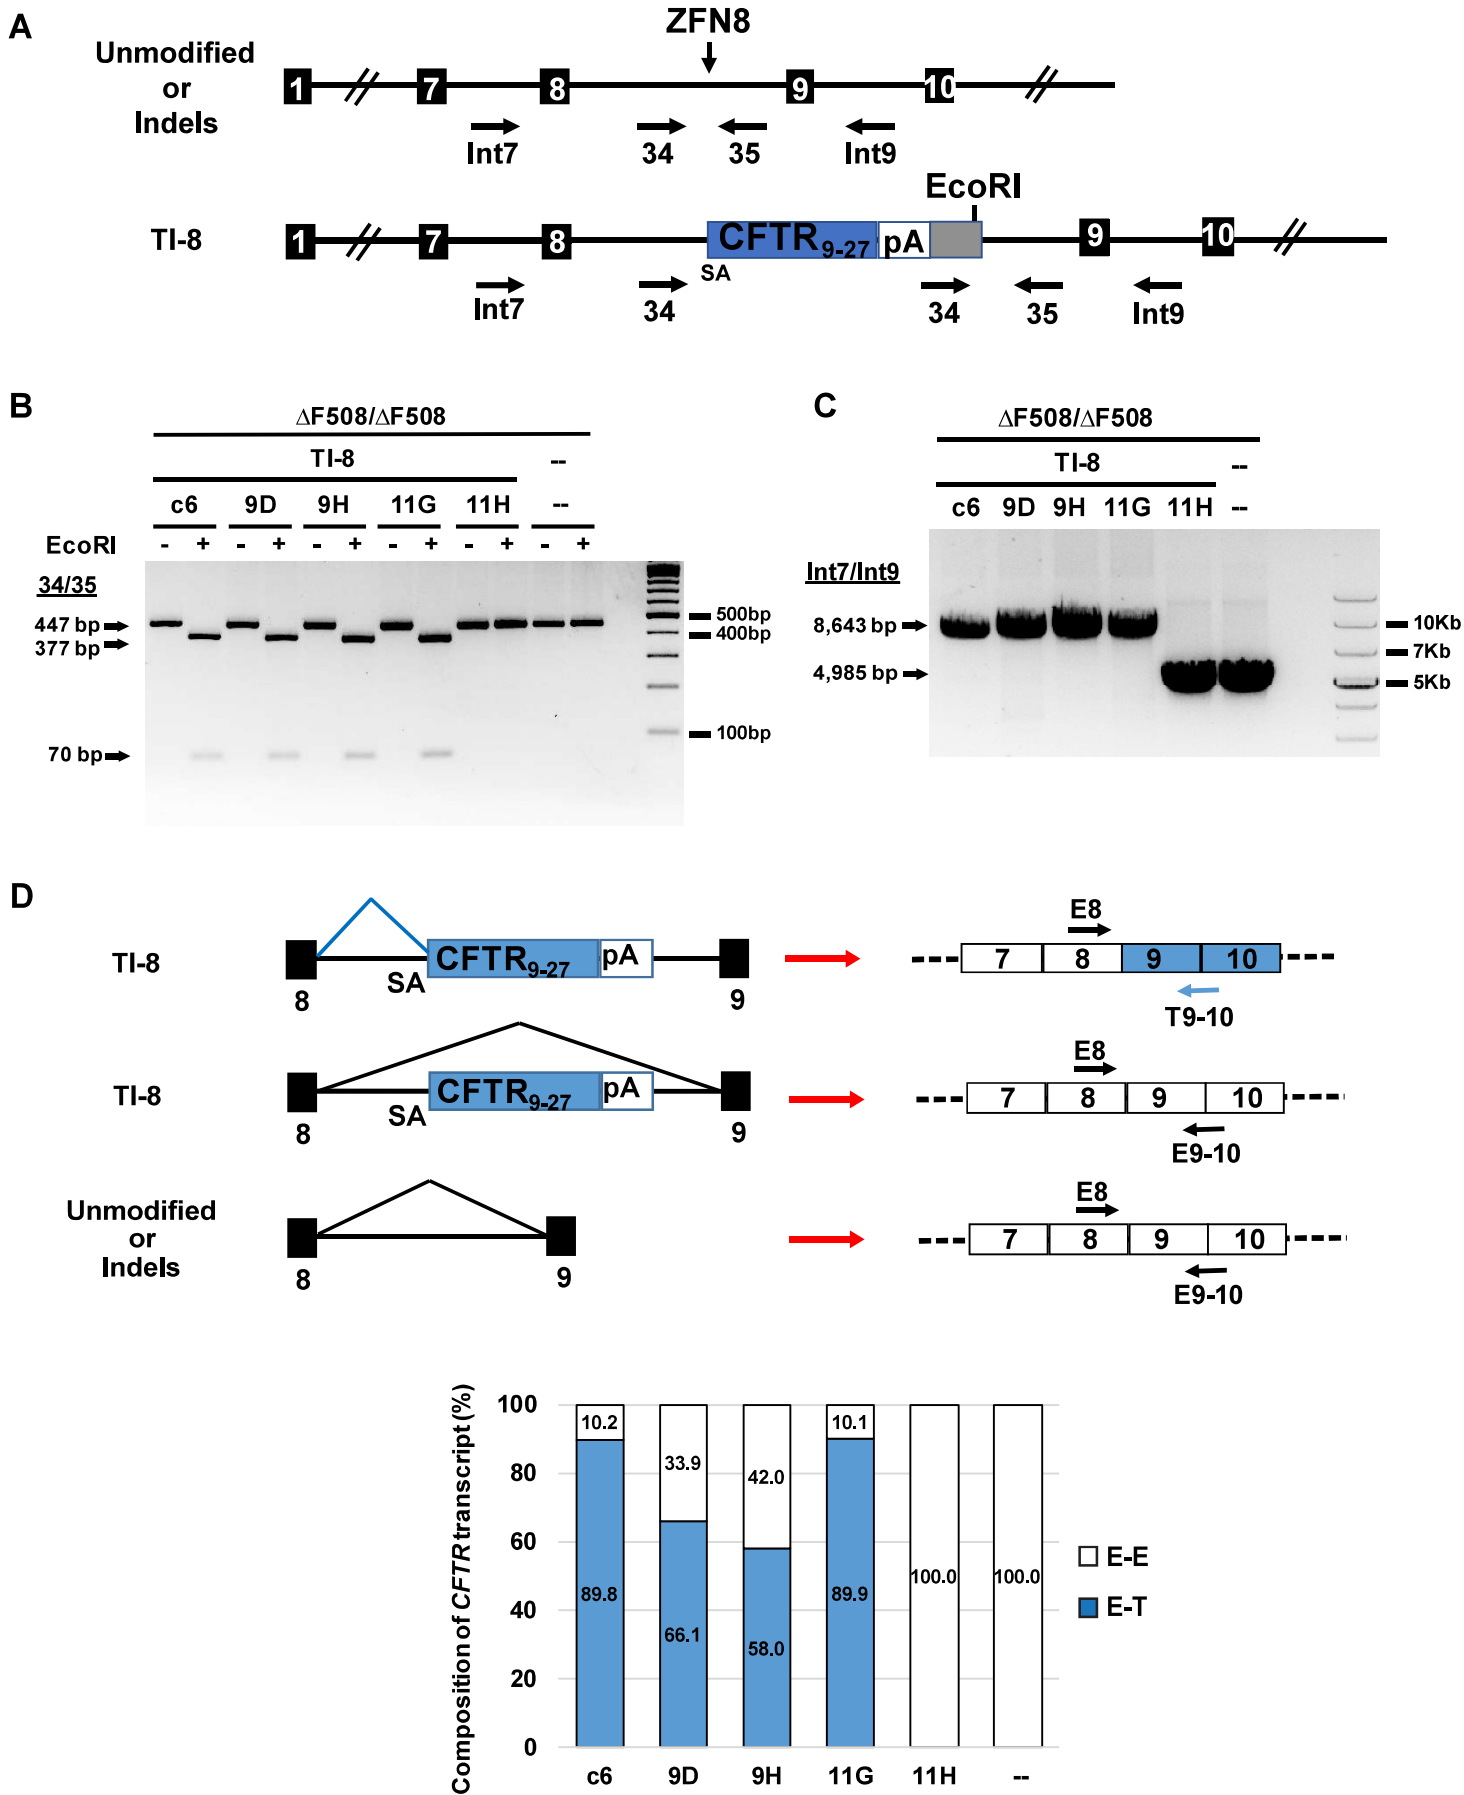

**Fig. S9**

**A**

| OT#  | Mock    |            | Parent ZFNs |                    |            | Improved ZFNs |                    |            | Genome notes              | Locus |
|------|---------|------------|-------------|--------------------|------------|---------------|--------------------|------------|---------------------------|-------|
|      | %Indels | #Seq reads | %Indels     | Bonferroni P-value | #Seq reads | %Indels       | Bonferroni P-value | #Seq reads |                           |       |
| On   | 0.0495  | 54497      | 97.6483     | 0                  | 54131      | 97.8171       | 0                  | 48835      | chr7:117541450-117541490  |       |
| OT2  | 0.097   | 57721      | 9.7478      | 0                  | 54966      | 0.293         | 9.466E-11          | 40612      | chr18:1439142-1439182     |       |
| OT3  | 0.2061  | 61150      | 1.8446      | 0                  | 42666      | 0.2268        | 0.907              | 52465      | chr11:116695570-116695610 |       |
| OT4  | 0.0367  | 48996      | 0.6216      | 0                  | 38929      | 0.0725        | 0.06811            | 34467      | chr1:200488808-200488848  |       |
| OT10 | 0.0653  | 52075      | 0.4425      | 0                  | 42263      | 0.1016        | 0.07636            | 56127      | chr1:201126946-201126986  |       |
| OT12 | 0.0087  | 57288      | 0.4717      | 0                  | 39004      | 0.1295        | 1.462E-10          | 39391      | chr1:109214368-109214408  |       |
| OT19 | 0.0726  | 23422      | 0.8946      | 0                  | 17214      | 0.2504        | 0.0001905          | 19168      | chr17:38257580-38257620   |       |
| OT21 | 0.032   | 40583      | 0.2062      | 6.217E-15          | 50439      | 0.0422        | 0.9376             | 35529      | chr4:186554568-186554608  |       |
| OT25 | 0.0224  | 44568      | 0.1152      | 9.259E-07          | 39939      | 0.0569        | 0.01642            | 47421      | chr9:97789720-97789760    |       |
| OT28 | 0.0484  | 80520      | 0.1754      | 2.219E-12          | 67858      | 0.0678        | 0.3134             | 53059      | chr1:269666994-26967034   |       |
| OT32 | 0.1038  | 85763      | 0.2097      | 0.00000141         | 62480      | 0.0657        | 1                  | 71526      | chr21:43502506-43502546   |       |

**B**

|                                                 | Exp     | %TI        | %Indels    | %Unmodified | #Seq reads |
|-------------------------------------------------|---------|------------|------------|-------------|------------|
| ZFN (2ug each)                                  | 1       | 0.00       | 94.55      | 5.45        | 43320      |
|                                                 | 2       | 0.00       | 94.57      | 5.43        | 49665      |
|                                                 | 3       | 0.11       | 94.69      | 5.20        | 51279      |
|                                                 | mean±SD | 0.0 ± 0.1  | 94.6 ± 0.1 | 5.36 ± 0.1  |            |
| ZFN (2ug each)<br>AAV6 (MOI=1x10 <sup>6</sup> ) | 1       | 51.30      | 44.53      | 4.17        | 45639      |
|                                                 | 2       | 56.62      | 37.91      | 5.47        | 53656      |
|                                                 | 3       | 59.92      | 35.08      | 5.00        | 47649      |
|                                                 | mean±SD | 56.0 ± 4.4 | 39.2 ± 4.9 | 4.9 ± 0.7   |            |

**C**

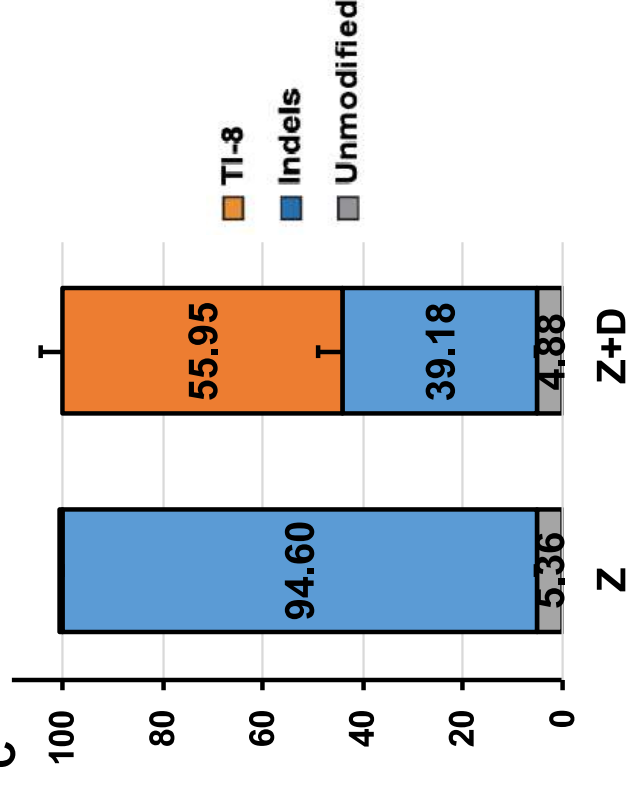

## Supplemental Figure Captions

**Fig. S1. Feeder-free expansion of primary airway basal cells.** (A) Population doublings (PDs) for non-CF basal cells in two established airway basal cell culture conditions, PneumaCult™-Ex Plus Medium (P-ExPlus) and dual SMAD inhibition condition (SMADinh). Non-CF basal cells at passage 1 (p1) were plated with each media and each dot represents total PD from p1 to each passage (up to p12). (B) Flow cytometric analysis of cell surface markers CD49f and NGFR at the indicated passage numbers. (C) Immunofluorescence staining of acetylated tubulin (ACT) at 4 weeks of ALI culture at the indicated number of passages. Representative 40x images in whole mount staining are shown. Scale bar: 50µm. (D) Representative tracings (short circuit current) of cell monolayers at 4 weeks of ALI evaluated by Ussing chamber analysis; the passage numbers are as indicated. (E) Summary of CFTR chloride current stimulated by forskolin and inhibited by CFTR inhibitor-172 (CFTR inh-172) is plotted. Difference of Isc ( $\Delta$ Isc) ( $\mu$ A/cm<sup>2</sup>) before and after stimulation or inhibition of CFTR are calculated from tracings represented by (D). (mean  $\pm$  SD, n=4 technical replicates)

**Fig. S2. Sequence-specific correction of  $\Delta$ F508 mutation.** (A) The ZFN11 left (L) and right (R) pair is designed to identify and cleave  $\Delta$ F508 *CFTR* sequences in exon 11. ZFN-L targets  $\Delta$ F508 (red box) while ZFN-R recognizes both *wt* and  $\Delta$ F508 *CFTR*. ZFN recognition sequences are colored in orange for ZFN11-L and in blue for ZFN11-R (the nucleotides within ZFN11-L and ZFN11-R that are denoted in black are skipped bases). (B) The percent correction mediated by ZFN11 and ssDNA was assessed by the TIDER (Tracking of Insertions, DEletions and Recombination events) bioinformatics tool (<https://tider.deskgen.com/>)<sup>1</sup>. 2µg of each ZFN11 mRNA was co-electroporated with the 200-mer ssDNA. Increases in the correction efficiency were observed with increased amounts of ssDNA. (C) Total cell number ( $\times 10^6$ ) at 3 days post-electroporation for the experiment shown in panel B. (D) The percent correction mediated by ZFN11 and AAV-6 donor was assessed by TIDER. Transduction with 2 kb AAV-6 donor was performed immediately after electroporation of 2µg or 3µg of each ZFN11 mRNA. Correction efficiency plateaued for MOI=10<sup>6</sup> (10<sup>6</sup> vg/cell) or higher (mean  $\pm$  SD, n=3 biological replicates).

**Fig. S3. Gene editing methodology does not alter airway basal cell differentiation.** Immunofluorescence staining for airway epithelium markers in ALI culture. ALI cultures were established from unmanipulated cells ( $\Delta$ F508/ $\Delta$ F508) or manipulated cells (Z+D(AAV)) in Fig. 2B. Major epithelial cell types were identified with markers: P63 for basal cell; MUC5AC for secretory cells; FOXJ1 for ciliated cells; FOXI1 for ionocytes. Representative 40x images in transverse section staining from three random fields in each biological replicate, experiment 1, 2 and 3. Scale bar: 50µm (Panels). % of indicated cell type (mean  $\pm$  SD, n=3 biological replicates). ns, not significant (Two-tailed paired t-test) (Graphs).

**Fig. S4. Sequence-specific  $\Delta$ F508 correction restores fully glycosylated CFTR protein expression.** Western blot of protein lysates harvested at 4 weeks of ALI culture of  $\Delta$ F508/ $\Delta$ F508 cells that were edited with ZFN11 together with either ssDNA or AAV-6 donors. Calnexin: loading control. The mature fully-glycosylated CFTR protein is identified as band C. For ZFN/ssDNA correction of  $\Delta$ F508 (% correction: 10.6  $\pm$  2.6) the level of restored CFTR band C was 68.2  $\pm$  16.3% of total CFTR protein. For ZFN/AAV correction of  $\Delta$ F508 (% correction: 31.0  $\pm$  4.0) the level of restored CFTR band C was 95.3  $\pm$  5.3% of total CFTR protein. We note that since the level of band B for  $\Delta$ F508/ $\Delta$ F508 cells is very low (likely reflecting degradation and absence of maturation), even modest rates of correction result in the fully glycosylated band C being the main form of CFTR protein.

**Fig. S5. Efficient SA-CFTR<sub>9-27</sub>-pA TI into CFTR intron 8 of  $\Delta$ F508/ $\Delta$ F508 airway basal cells.** (A) Inside-outside PCR amplification at the 5' end of the targeted transgene at 4 days of genome editing. A 788 bp PCR fragment was amplified with one primer targeting inside of the codon-optimized sequence (blue arrow in the schematic) and another primer targeting outside of left homology arm (H<sub>L</sub>) (Black). (B) Indel and TI-8 diagram showing *CFTR* intron 8 genomic organization. Horizontal arrows indicate the oligo priming sites, and expected PCR amplicon sizes are shown. Only when ZFN8 and AAV-6 donor were co-delivered did Eco RI cleave the 3' end 447 bp PCR amplicon, evidence for TI-8. (C) Representative tracings (Isc) of cell monolayers from 5 experimental conditions: DMSO-treated, VX-

809/VX-770 pre-treated, TI7: Z7+D-treated and TI8: Z8+D-treated CF ( $\Delta F508/\Delta F508$ ), and non-CF evaluated by Ussing chamber analysis at 4 weeks of ALI culture.

**Fig. S6. Efficient SA-*CFTR*<sub>8-27</sub>-pA TI into *CFTR* intron 7 of  $\Delta F508/\Delta F508$  airway basal cells.** (A) Schematic of site-specific targeted editing of *CFTR* intron 7. Indel diagram shows *CFTR* genomic organization between exon 7 and 8 (black boxes) (not to scale). TI-7 diagram shows intron 7 TI of human codon optimized *CFTR*<sub>8-27</sub> cDNA preceded by a splice acceptor, followed by bovine growth hormone (bGH) pA sequence, and flanked by 246 bp homology left (H<sub>L</sub>) and 271 bp homology right (H<sub>R</sub>) intron 7 sequences. Horizontal arrows indicate oligos amplifying unmodified, indel or TI-7 events and used to quantify frequency of each by NGS. Lower gel shows evidence for TI-7 via Eco RI digestion. (B) The genome modification frequency determined by NGS for a TI-7 experiment. The efficiency was measured 4 days after the delivery of ZFNs targeting intron 7 (ZFN7) followed immediately by AAV-6 *CFTR*<sub>8-27</sub> cDNA donor. Z: ZFN7 alone (23,337 NGS reads), Z+D: ZFN7 and AAV-6 donor (29,843 NGS reads). (C) Detection of transgene *CFTR*<sub>8-27</sub> mRNA. Schematic of *CFTR* endogenous and transgene mRNA. RT-PCR with oligos E7 (endogenous exon 7) and T9 (transgene exon 9) showed the expected 349 bp amplicon only in the TI-7  $\Delta F508/\Delta F508$  sample, while PCR amplification with oligos E7 and E9 (endogenous exon 9) shows the expected 349 bp amplicon in all samples. (D) Restoration of fully glycosylated CFTR protein via TI-7. Western blot of protein lysates harvested at 4 weeks of ALI culture. CFTR band C is absent in  $\Delta F508/\Delta F508$  cells, but restored for both TI-8 and TI-7  $\Delta F508/\Delta F508$ . Calnexin: loading control. (E) Summary of CFTR function. Bulk TI-7  $\Delta F508/\Delta F508$  cells in ALI cultures showed the restoration of CFTR function measured as  $\Delta I_{sc}$  ( $\mu A/cm^2$ ) at levels similar to  $\Delta F508/\Delta F508$  cells treated with VX-809/VX-770.

**Fig. S7. Efficient TI of SA-*CFTR*<sub>9-27</sub>-pA into *CFTR* intron 8 of  $\Delta F508/R553X$  and G542X/R785X airway basal cells.** The expected inside-outside PCR amplification at the 5' end (A) and Eco RI digestion of the 3' end PCR fragment (B) was present only in TI-8  $\Delta F508/R553X$  and TI-8 G542X/R785X basal cells. (C, D) Representative tracings (Isc) of cell monolayers with (C)  $\Delta F508/R553X$  or (D) G542X/R785X *CFTR* genotypes. The following chronic treatments and experimental conditions were applied: DMSO-treated CF, VX-809/VX-770 pre-treated CF, or TI8: Z8+D-treated CF; a non-CF control was evaluated in parallel. Ussing chamber analysis was performed at 4 weeks of ALI culture.

**Fig. S8. The majority of *CFTR* transcripts from TI-8 alleles incorporates the corrective transgene sequences.** (A) Schematic of *CFTR* gene showing location of PCR primers employed for genotyping of edited single-cell derived clones. Primers are identified by black horizontal arrows. (B) Shown is the EcoRI digestion pattern for four homozygous TI-8 clones (c6, 9D, 9H and 11G), one non-TI clone (11H), and the parental  $\Delta F508/\Delta F508$  cells. TI-8 is evidenced by EcoRI cleavage of the 447 bp PCR amplicon (primers 34/35); absence of the undigested 447bp band in the EcoRI treated lane is consistent with TI-8 homozygosity. (C) Homozygosity of the four clones (c6, 9D, 9H, 11G) was confirmed by PCR amplification (primers Int7/Int9): the presence of the 8.64 kb band is characteristic of TI-8 while the absence of a band at 4.99 kb (or similar size due to possibility of Indels) confirms TI-8 homozygosity. (D) Composition of transcripts from TI-8 alleles. Shown above are schematics of normal and alternate splicing of *CFTR* transcripts. The E8/E9-10 RT-PCR amplicon can either arise from a non-TI allele (unmodified or with indels) or from alternate splicing in a TI-8 allele from the endogenous exon 8 across the corrective transgene to the downstream endogenous exon 9. The E8/T9-10 RT-PCR amplicon reflects the desired splicing from endogenous exon 8 to the transgene exon 9. The reverse primer T9-10 recognizes only codon-optimized transgene at exon 9-10 junction (blue) while the reverse primer E9-10 recognizes the endogenous exon 9-10 junction (black). Either primer together with the forward primer E8 amplify a 139 bp RT-PCR amplicon used for absolute quantitative PCR. The graph shows the composition (E-E vs. E-T) of *CFTR* transcripts.

**Fig. S9. Optimization of ZFN8 decreases off-target activity while maintaining efficient cleavage and TI at intron 8.** (A) Examination, via deep sequencing, of previously identified off-target sites in basal cells treated with either parental or optimized ZFN8. Ten loci out of 31 candidates originally identified via unbiased genome-wide oligonucleotide capture in K562 cells (Table S4) yielded a statistically significant (Bonferroni P-value <0.05) level of

indels in  $\Delta F508/\Delta F508$  basal cells electroporated with parental ZFN8 and only 4 loci yielded a statistically significant level of indels in optimized ZFN8 as compared to mock electroporated control basal cells. **(B and C)** Frequency of genome modification in  $\Delta F508/\Delta F508$  basal cells utilizing the optimized ZFN8s followed by AAV-6 transduction of the *SA-CFTR<sub>9-27</sub>-pA* donor. Editing events were categorized as corrected (TI-8), indels, or unmodified. Three individual experiments were performed (mean  $\pm$  SD, n=3 biological replicates); mean values are presented in (C).

Table S1

|                                        | <b>Exp</b>     | <b>%Corrected</b> | <b>%Indels</b>    | <b>%Unmodified</b> | <b>#Seq reads</b> |
|----------------------------------------|----------------|-------------------|-------------------|--------------------|-------------------|
| <b>ZFN (2µg each)</b>                  | 1              | 0.0               | 44.8              | 55.2               | 30662             |
|                                        | 2              | 0.0               | 42.1              | 57.9               | 28668             |
|                                        | 3              | 0.0               | 47.0              | 53.0               | 35480             |
|                                        | <b>mean±SD</b> | <b>0.0 ± 0.0</b>  | <b>44.6 ± 2.4</b> | <b>55.4 ± 2.4</b>  |                   |
| <b>ZFN (2µg each)<br/>ssDNA (20µg)</b> | 1              | 13.0              | 53.0              | 34.1               | 19184             |
|                                        | 2              | 11.1              | 47.3              | 41.7               | 24706             |
|                                        | 3              | 7.9               | 52.8              | 39.3               | 28720             |
|                                        | <b>mean±SD</b> | <b>10.6 ± 2.6</b> | <b>51.0 ± 3.2</b> | <b>38.4 ± 3.9</b>  |                   |

|                                                      | <b>Exp</b>     | <b>%Corrected</b> | <b>%Indels</b>    | <b>%Unmodified</b> | <b>#Seq reads</b> |
|------------------------------------------------------|----------------|-------------------|-------------------|--------------------|-------------------|
| <b>ZFN (3µg each)</b>                                | 1              | 0.0               | 48.9              | 51.1               | 23589             |
|                                                      | 2              | 0.0               | 44.2              | 55.8               | 28238             |
|                                                      | 3              | 0.0               | 37.4              | 62.5               | 36707             |
|                                                      | <b>mean±SD</b> | <b>0.0 ± 0.0</b>  | <b>43.5 ± 5.7</b> | <b>56.5 ± 5.7</b>  |                   |
| <b>ZFN (3µg each)<br/>AAV (MOI=2x10<sup>6</sup>)</b> | 1              | 34.9              | 20.2              | 45.0               | 31866             |
|                                                      | 2              | 31.2              | 21.5              | 47.3               | 23111             |
|                                                      | 3              | 26.9              | 17.6              | 55.4               | 30344             |
|                                                      | <b>mean±SD</b> | <b>31.0 ± 4.0</b> | <b>19.8 ± 1.9</b> | <b>49.3 ± 5.5</b>  |                   |

**Table S2****A**

|        | #inserts | Cell type                    |              | Forskolin                                |         | CFTR Inh.-172                            |         |
|--------|----------|------------------------------|--------------|------------------------------------------|---------|------------------------------------------|---------|
|        |          |                              |              | $\Delta$ Is <sub>c</sub> (mean $\pm$ SD) | %non-CF | $\Delta$ Is <sub>c</sub> (mean $\pm$ SD) | %non-CF |
|        | n=4      | non-CF                       | no treatment | 62.1 $\pm$ 12.5                          | 100     | -72.2 $\pm$ 12.4                         | 100     |
|        | n=3      |                              | DMSO         | 3.6 $\pm$ 0.1                            | 5.8     | -2.6 $\pm$ 0.4                           | 3.6     |
|        | n=4      |                              | VX809/VX770  | 13.2 $\pm$ 2.0                           | 21.3    | -19.2 $\pm$ 3.4                          | 26.6    |
| Exp. 1 | n=4      | $\Delta$ F508/ $\Delta$ F508 | ZFN+ssDNA    | 8.6 $\pm$ 0.9                            | 13.8    | -12.4 $\pm$ 1.8                          | 17.2    |
| Exp. 2 | n=4      |                              | ZFN+ssDNA    | 9.9 $\pm$ 2.0                            | 15.9    | -13.9 $\pm$ 3.1                          | 19.3    |
| Exp. 3 | n=4      |                              | ZFN+ssDNA    | 6.0 $\pm$ 1.0                            | 9.7     | -7.5 $\pm$ 0.6                           | 10.4    |

|        | #inserts | Cell type                    |              | Forskolin                                |         | CFTR Inh.-172                            |         |
|--------|----------|------------------------------|--------------|------------------------------------------|---------|------------------------------------------|---------|
|        |          |                              |              | $\Delta$ Is <sub>c</sub> (mean $\pm$ SD) | %non-CF | $\Delta$ Is <sub>c</sub> (mean $\pm$ SD) | %non-CF |
| Exp. 1 | n=4      | $\Delta$ F508/ $\Delta$ F508 | DMSO         | 1.0 $\pm$ 0.1                            | 1.9     | -0.6 $\pm$ 0.3                           | 1.0     |
|        | n=4      |                              | VX809/VX770  | 12.3 $\pm$ 3.1                           | 23.5    | -15.8 $\pm$ 3.5                          | 27.5    |
|        | n=4      |                              | ZFN+AAV      | 18.9 $\pm$ 0.6                           | 36.1    | -27.4 $\pm$ 1.4                          | 47.7    |
| Exp. 2 | n=4      | non-CF                       | no treatment | 53.4 $\pm$ 1.9                           | 100     | -55.8 $\pm$ 9.0                          | 100     |
|        | n=4      | $\Delta$ F508/ $\Delta$ F508 | DMSO         | 1.1 $\pm$ 0.1                            | 2.1     | -0.4 $\pm$ 0.7                           | 0.7     |
|        | n=4      |                              | VX809/VX770  | 13.9 $\pm$ 3.6                           | 26.0    | -17.9 $\pm$ 4.9                          | 32.1    |
|        | n=4      |                              | ZFN+AAV      | 24.2 $\pm$ 1.1                           | 45.3    | -32.2 $\pm$ 2.8                          | 57.7    |
| Exp. 3 | n=4      | non-CF                       | no treatment | 44.9 $\pm$ 3.4                           | 100     | -59.7 $\pm$ 7.7                          | 100     |
|        | n=4      | $\Delta$ F508/ $\Delta$ F508 | DMSO         | 1.3 $\pm$ 0.2                            | 2.9     | -0.1 $\pm$ 1.0                           | 0.2     |
|        | n=4      |                              | VX809/VX770  | 13.7 $\pm$ 1.0                           | 30.5    | -20.6 $\pm$ 0.7                          | 34.5    |
|        | n=4      |                              | ZFN+AAV      | 17.6 $\pm$ 0.8                           | 39.2    | -26.0 $\pm$ 1.4                          | 43.6    |

**B**

| #Biological replicates | Cell type                    |              | Forskolin                                |                | CFTR Inh.-172                            |                |
|------------------------|------------------------------|--------------|------------------------------------------|----------------|------------------------------------------|----------------|
|                        |                              |              | $\Delta$ Is <sub>c</sub> (mean $\pm$ SD) | %non-CF        | $\Delta$ Is <sub>c</sub> (mean $\pm$ SD) | %non-CF        |
| n=1                    | non-CF                       | no treatment | 62.1                                     | 100            | -72.2                                    | 100            |
| n=1                    | $\Delta$ F508/ $\Delta$ F508 | DMSO         | 3.6                                      | 5.8            | -2.6                                     | 3.6            |
| n=1                    |                              | VX809/VX770  | 13.2                                     | 21.3           | -19.2                                    | 26.6           |
| n=3                    |                              | ZFN+ssDNA    | 8.2 $\pm$ 2.0                            | 13.2 $\pm$ 3.2 | -12.4 $\pm$ 1.8                          | 15.6 $\pm$ 4.6 |

| #Biological replicates | Cell type                    |              | Forskolin                                |                 | CFTR Inh.-172                            |                 |
|------------------------|------------------------------|--------------|------------------------------------------|-----------------|------------------------------------------|-----------------|
|                        |                              |              | $\Delta$ Is <sub>c</sub> (mean $\pm$ SD) | %non-CF         | $\Delta$ Is <sub>c</sub> (mean $\pm$ SD) | %non-CF         |
| n=3                    | non-CF                       | no treatment | 50.2 $\pm$ 4.7                           | 100.0 $\pm$ 0.0 | -57.5 $\pm$ 4.6                          | 100.0 $\pm$ 0.0 |
| n=3                    | $\Delta$ F508/ $\Delta$ F508 | DMSO         | 1.1 $\pm$ 0.2                            | 2.3 $\pm$ 0.5   | -0.4 $\pm$ 0.2                           | 0.6 $\pm$ 0.4   |
| n=3                    |                              | VX809/VX770  | 13.3 $\pm$ 0.9                           | 26.7 $\pm$ 3.6  | -18.1 $\pm$ 2.4                          | 31.4 $\pm$ 3.6  |
| n=3                    |                              | ZFN+AAV      | 20.2 $\pm$ 3.5                           | 40.2 $\pm$ 4.7  | -57.7 $\pm$ 2.0                          | 49.6 $\pm$ 7.3  |

Table S3

**A**

|               | Exp | ZFN            | AAV(MOI)        | %TI            | %Indels        | %Unmodified    | #Seq reads |
|---------------|-----|----------------|-----------------|----------------|----------------|----------------|------------|
| Z             | 1   | 2 $\mu$ g each | NA              | 0.0            | 86.9           | 13.1           | 8061       |
|               | 2   |                |                 | 0.0            | 92.4           | 7.6            | 8792       |
|               | 3   |                |                 | 0.0            | 77.8           | 22.2           | 17385      |
|               | 4   |                |                 | 0.0            | 90.0           | 10             | 14872      |
|               | 5   |                |                 | 0.0            | 85.4           | 14.6           | 21852      |
| mean $\pm$ SD |     |                |                 | 0.0 $\pm$ 0.0  | 86.5 $\pm$ 5.6 | 13.5 $\pm$ 5.6 |            |
| Z+D<br>(AAV)  | 1   | 2 $\mu$ g each | 2 $\times 10^6$ | 47.0           | 42.8           | 10.2           | 8245       |
|               | 2   |                | 6 $\times 10^6$ | 50.1           | 43.2           | 6.7            | 8427       |
|               | 3   |                | 2 $\times 10^6$ | 60.3           | 23.5           | 16.2           | 16136      |
|               | 4   |                | 2 $\times 10^6$ | 64.2           | 28.3           | 7.6            | 17218      |
|               | 5   |                | 2 $\times 10^6$ | 60.7           | 27.4           | 11.9           | 19226      |
| mean $\pm$ SD |     |                |                 | 56.5 $\pm$ 7.4 | 33.0 $\pm$ 9.3 | 10.5 $\pm$ 3.8 |            |

**B**

| $\Delta$ F508/ $\Delta$ F508                        | Exp 2          | %TI  | %Indels | %Unmodified | #Seq reads |
|-----------------------------------------------------|----------------|------|---------|-------------|------------|
| ZFN (2 $\mu$ g each)                                | 4 days         | 0.0  | 92.4    | 7.6         | 8792       |
| ZFN (2 $\mu$ g each)<br>AAV6 (MOI=6 $\times 10^6$ ) |                | 50.1 | 43.2    | 6.7         | 8427       |
| ZFN (2 $\mu$ g each)                                | 30 days<br>ALI | 0.0  | 94.0    | 6.0         | 8805       |
| ZFN (2 $\mu$ g each)<br>AAV6 (MOI=6 $\times 10^6$ ) |                | 43.9 | 47.3    | 8.9         | 9675       |

**C**

| $\Delta$ F508/R553X                                 | Exp | %TI            | %Indels        | %Unmodified    | #Seq reads |
|-----------------------------------------------------|-----|----------------|----------------|----------------|------------|
| ZFN (2 $\mu$ g each)<br>AAV6 (MOI=2 $\times 10^6$ ) | 1   | 44.9           | 36.2           | 18.9           | 7964       |
|                                                     | 2   | 48.6           | 20.5           | 30.9           | 16218      |
|                                                     | 3   | 56.6           | 24.8           | 18.6           | 17894      |
| mean $\pm$ SD                                       |     | 50.0 $\pm$ 6.0 | 27.2 $\pm$ 8.1 | 22.8 $\pm$ 7.0 |            |

**D**

| G542X/R785X                                         | Exp | %TI            | %Indels        | %Unmodified    | #Seq reads |
|-----------------------------------------------------|-----|----------------|----------------|----------------|------------|
| ZFN (2 $\mu$ g each)<br>AAV6 (MOI=2 $\times 10^6$ ) | 1   | 53.2           | 34.8           | 12.0           | 8395       |
|                                                     | 2   | 66.0           | 25.5           | 8.5            | 14035      |
|                                                     | 3   | 61.7           | 26.2           | 12.0           | 21710      |
|                                                     | 4   | 66.0           | 26.0           | 7.92           | 17329      |
| mean $\pm$ SD                                       |     | 61.8 $\pm$ 6.0 | 28.1 $\pm$ 4.4 | 10.1 $\pm$ 2.2 |            |



**Table S4**

| OT#  | Chromosome | Start(hg38) | End(hg38) | Oligo capture events |
|------|------------|-------------|-----------|----------------------|
| OT1  | chr7       | 117541450   | 117541490 | 624                  |
| OT2  | chr18      | 1439142     | 1439182   | 400                  |
| OT3  | chr11      | 116695570   | 116695610 | 157                  |
| OT4  | chr1       | 200488808   | 200488848 | 154                  |
| OT5  | chr7       | 43884378    | 43884418  | 22                   |
| OT6  | chr2       | 172021700   | 172021740 | 21                   |
| OT7  | chrX       | 156024044   | 156024084 | 20                   |
| OT8  | chrY       | 57210564    | 57210604  | 20                   |
| OT9  | chr1       | 186506      | 186546    | 19                   |
| OT10 | chr1       | 201126946   | 201126986 | 19                   |
| OT11 | chr12      | 16100       | 16140     | 19                   |
| OT12 | chr1       | 109214368   | 109214408 | 18                   |
| OT13 | chr15      | 101974938   | 101974978 | 17                   |
| OT14 | chr16      | 15668       | 15708     | 16                   |
| OT15 | chr2       | 30481092    | 30481132  | 16                   |
| OT16 | chr4       | 39348778    | 39348818  | 16                   |
| OT17 | chr9       | 16096       | 16136     | 16                   |
| OT18 | chr1       | 15984       | 16024     | 15                   |
| OT19 | chr17      | 38257580    | 38257620  | 15                   |
| OT20 | chr17      | 47530832    | 47530872  | 15                   |
| OT21 | chr4       | 186554568   | 186554608 | 14                   |
| OT22 | chr2       | 113597412   | 113597452 | 12                   |
| OT23 | chr6       | 13274234    | 13274274  | 12                   |
| OT24 | chrX       | 101803712   | 101803752 | 12                   |
| OT25 | chr9       | 97789720    | 97789760  | 12                   |
| OT26 | chr12      | 54698438    | 54698478  | 11                   |
| OT27 | chr17      | 38677118    | 38677158  | 10                   |
| OT28 | chr1       | 26966994    | 26967034  | 9                    |
| OT29 | chr3       | 90645844    | 90645884  | 7                    |
| OT30 | chr3       | 90645930    | 90645970  | 7                    |
| OT31 | chr6       | 5711448     | 5711488   | 7                    |
| OT32 | chr21      | 43502506    | 43502546  | 7                    |

## Table S5

### Primary antibody

| Target                | Host                         | Cat#      | Manufacturer               | Purpose      | Dilution |
|-----------------------|------------------------------|-----------|----------------------------|--------------|----------|
| CFTR                  | Mouse IgG2b                  | A4, 596   | Cystic Fibrosis Foundation | Western Blot | 1:1000   |
| Calnexin              | Rabbit polyclonal            | ab22595   | Abcam                      | Western Blot | 1:5000   |
| FOXJ1                 | Mouse monoclonal IgG1        | 14996580  | Invitrogen                 | IF           | 1:200    |
| FOXI1                 | Rabbit polyclonal IgG        | HPA071469 | Sigma                      | IF           | 1:200    |
| Acetylated Tubulin    | Mouse monoclonal IgG2b       | T7451     | Sigma                      | IF           | 1:1000   |
| TP63 (N2C1)           | Rabbit polyclonal IgG        | GTX102425 | GeneT ex                   | IF           | 1:100    |
| TP63 (4A4)            | Mouse monoclonal IgG2a/kappa | CM163A    | Biocare                    | IF           | 1:100    |
| MUC5AC (45M1)         | Mouse monoclonal IgG1-kappa  | MS-145-PO | Thermo                     | IF           | 1:200    |
| MUC5AC (E309I)        | Rabbit monoclonal IgG        | 61193     | CST                        | IF           | 1:200    |
| Keratin 5 (Poly19055) | Rabbit polyclonal            | 905501    | Biologend                  | IF           | 1:200    |
| Keratin 5 (D4U8Q)     | Rabbit monoclonal IgG        | 25807     | CST                        | IF           | 1:200    |
| CD49f, PE             | Rat monoclonal IgG2a, κ      | 313612    | Biologend                  | Flow Cyt     | 1:50     |
| CD271 (NGFR), APC     | Mouse monoclonal IgG1        | 345108    | Biologend                  | Flow Cyt     | 1:50     |

### Secondary antibody

| Name                                                           | Cat#     | Manufacturer | Purpose      | Dilution |
|----------------------------------------------------------------|----------|--------------|--------------|----------|
| HRP-linked horse anti-mouse IgG                                | 7076S    | CST          | Western Blot | 1:5000   |
| HRP-linked goat anti-rabbit IgG                                | ab205718 | Abcam        | Western Blot | 1:20000  |
| Alexa Fluor Plus 555 Donkey anti-Rabbit IgG (H+L)              | A32794   | Invitrogen   | IF           | 1:500    |
| Alexa Fluor 488 Donkey anti-mouse IgG (H+L)                    | A21202   | Invitrogen   | IF           | 1:500    |
| Alexa Fluor 555 Goat anti-Mouse IgG (H+L)                      | A21424   | Invitrogen   | IF           | 1:500    |
| Alexa Fluor 488 F(ab') <sub>2</sub> -Goat anti-Mouse IgG (H+L) | A11017   | Invitrogen   | IF           | 1:500    |

## Table S6

| Name                | 5' to 3'                                  | purpose                          |
|---------------------|-------------------------------------------|----------------------------------|
| CFaav2kbFw          | ATAAGAATGCGGCCGCCCTCTGCTACCT<br>CCTTTCCTT | 2kb CFTR AAV6 construct          |
| CFaav2kbRv          | ATAAGAATGCGGCCGCATCTAATCCACG<br>GTTTGCCC  | 2kb CFTR AAV6 construct          |
| CFi10aFw            | AGTCTATATTTGTTTTCCAGTGGC                  | Amplification of targeted region |
| CFi11aRv            | TCCGCAACTTTTCCACTCGTA                     | Amplification of targeted region |
| CF5                 | CATTCACAGTAGCTTACCCA                      | Sanger sequencing                |
| Miseq-e11-Fw        | GGGAGAACTGGAGCCTTCAG                      | MiSeq Exon11                     |
| Miseq-e11-Rv        | GTAGTGTGAAGGGTTCATATGC                    | MiSeq Exon11                     |
| CF34f               | GCAAGGCAAGGACCAGGC                        | EcoR1 TI-8                       |
| CF35r               | GCCAAGCACTAGGATTCATCAT                    | EcoR1 TI-8                       |
| CF36f               | GGATGGTGTCAATATGGGTTATG                   | EcoR1 TI-7                       |
| CF37r               | CTCTGATATCCTTGTCATCACCC                   | EcoR1 TI-7                       |
| 72CF-wtE8f          | GAAGGCAGCCTATGTGAGATAC                    | RT-PCR TI-8                      |
| 81CF-wtE9r          | CAATGTCTTATATTCTTGCTTTTGTA                | RT-PCR TI-8                      |
| 81CF-optE9r         | GTA CTCTGCTTCTGCAGGAAGT                   | RT-PCR TI-8                      |
| 70CF-wt7f           | AGCTGGGAAGATCAGTGAAAG                     | RT-PCR TI-7                      |
| 81CF-wtE9r          | CAATGTCTTATATTCTTGCTTTTGTA                | RT-PCR TI-7                      |
| 81CF-optE9r         | GTA CTCTGCTTCTGCAGGAAGT                   | RT-PCR TI-7                      |
| Miseq-i8-Fw (CF34f) | GCAAGGCAAGGACCAGGC                        | MiSeq intron 8                   |
| Miseq-i8-Rv         | GAAGGGCTCTATTAGAGACTCC                    | MiSeq intron 8                   |
| Miseq-i7-Fw         | GAGGTACCATTTTGGATGGTG                     | MiSeq intron 7                   |
| Miseq-i7-Fw         | CAGGTGAGCAATAATGTTTGGG                    | MiSeq intron 7                   |
| CF41f               | AGAGGTTGCAAATGGTGTCC                      | Clone genotype                   |
| CFintron7f          | GAGTCCCTCTTAGTTCTGCAC                     | Clone genotype                   |
| CFintron9r          | GTCCAGGTGCTAACAAAACCTCAG                  | Clone genotype                   |
| WTex8 qPCRf         | TATGACTCTCTTGGAGCAATAAAC                  | Quantitative RT-PCR TI-8         |
| WTex9-10 qPCRr      | ATTCCCCAAATCCCTCCTCC                      | Quantitative RT-PCR TI-8         |
| optex9-10r          | ACTCTCCGAAGCCTTCCTCC                      | Quantitative RT-PCR TI-8         |

Table S7

| index | fragment ends         | sample name | number of mapped read pair |
|-------|-----------------------|-------------|----------------------------|
| AH756 | paired end sequencing | Non-CF ALI  | 46271019                   |
| AH757 | paired end sequencing | CF ALI      | 45444368                   |
| AH758 | paired end sequencing | TI-8 CF ALI | 37920997                   |
| AH774 | paired end sequencing | Non-CF ALI  | 43663380                   |
| AH775 | paired end sequencing | CF ALI      | 40605607                   |
| AH776 | paired end sequencing | TI-8 CF ALI | 29903855                   |

## Supplemental Table Captions

**Table S1. Sequence-specific correction of  $\Delta F508$  mutation.** Percentage of genome modification analyzed by NGS. Editing events were categorized as corrected, indels, or unmodified. Three individual experiments were performed (mean  $\pm$  SD, n=3 biological replicates) and mean values are presented in Fig. 2B.

**Table S2. Sequence-specific  $\Delta F508$  correction restores CFTR function.** (A) CFTR chloride current stimulated by forskolin and inhibited by CFTR inhibitor-172 (CFTR inh-172). Mean values are obtained from 3 to 4 inserts as indicated (mean  $\pm$  SD, n=3 or 4 technical replicates). (B) The average of indicated biological replicates, experiment 1, 2 and 3 in (A) (mean  $\pm$  SD, n=3 biological replicates). Bottom half of table is presented in Fig. 2F.

### **Table S3. Efficient TI of *SA-CFTR*<sub>9-27</sub>-pA into *CFTR* intron 8 in CF airway basal cells**

Frequency of intron 8 genome modification in  $\Delta F508/\Delta F508$  (A, B),  $\Delta F508/R553X$  (C), and G542X/R785X basal cells (D) as determined by NGS. Editing events were characterized as corrected, indels, or unmodified. Mean and SD are shown where the biological experiments were independently replicated (n=3 to 5).

**Table S4. Unbiased identification of potential off-target genome modification sites by ZFN8.** A panel of 31 candidate top off-target sites (designated “OT2” through “OT32”) was identified via unbiased oligonucleotide capture studies of the lead pair of ZFNs targeting human *CFTR* intron 8 in K562 cells. The top scored site of oligonucleotide capture was the intended on-target site within *hCFTR* intron 8 (hg38 coordinates chr7:117541450-117541490), which was designated “OT1”.

**Table S5. List of antibodies.**

**Table S6. List of oligos.**

**Table S7. Number of sequencing reads in ATAC-seq experiments.**

## Donor DNA sequences

### 200-mer ssODN (5'-3'): Site-specific $\Delta$ F508 correction

tcagagggtaaaattaagcacagtggaagaatttcatttctgttctcagtttctcggattatgcctggcaccattaaagaaaatc  
atctttgggtttcctatgatgaatatagatacagaagcgtcatcaaagcatgccaactagaagaggtaagaaactatgtgaaaact  
ttttgattatgcatatgaacccttca

### 2 kb *wtCFTR* AAV donor DNA (From 5'ITR through 3'ITR): Site-specific $\Delta$ F508 correction

cctgcaggcagctgcgcgctcgtcgtcactgaggccgccggggtcggcgacccttggctcggccggcctcagtgagcgagcga  
gcgcgcagagagggtggccaaactccatcactaggggttcctgcccattggatttaaattctagaaggcctgcggcccatcta  
cacggtttgccttttccatttttggatactgtattttaagctacattttactttctcgaattttttcataaaaagattatat  
aaaggaattgcaaatgccaactatcaaagataattgcttttgaatcacaaacactatttggagtatactgtcaataaacttcatagta  
acatattccctgcctaacttacagcaataactactgaaccaccatcacacaatttacatagtgaaacagcacaagatccatata  
ctggtttctccttggaatacttcatgtaattttcagataaattagctcattctccaatattgttgtgaaatgagtaatgacatcatctt  
cattttgctctcgtcatcaaagaattgcagtcactagaagttatatggtatttgttcaaagccagggatacaaatcttcacaatttt  
accctctaaattctctgctggcagatcaatgctcattccattaggctatagttattataaaattattaaaataatcttaataatttt  
tgaggtatatttttaaagatgcatattttgtggatctttttaaagataaccacatcactttatgcatgccatataaaataacca  
ttgaggacgtttgtctcactaatgagtgaaacaaaattctcaccattttcataaaatgcattttattgtgatcaaatgaaccattattt  
aaaaataaattgcattttattcatgtgtttgcaagcttcttaaagcataggtcatgtgttttattaattgatccattcacagtagc  
ttaccatagaggaaacataaataatgtagactaaccgattgaaataggagccaaatataaatttgggtagtggaagggtcat  
atgcataatcaaaaagttttcacatagtttcttacctcttctagttggcatgctttgatgacgcttctgtatctatattcatcatag  
gaaacaccaaaagatgataattttctttaatggtgccaggcataatccaggaaactgagaacagaatgaaattcttccactgtgctta  
attttaccctctgaaggctccagttctccataatcaccattagaagtgaagtctggaaataaaacccatcattattaggtcattat  
caaatacagctcaggattcacttgcctccaattatcatcctaagcagaagtgtatattcttattttgtaaagattctattaactcatt  
tgattcaaaatattttaaatacttctgtttcaggtactctgctatgcacaaaagatacaagggaagtaaaagagacaattacaat  
acagtgtgacaagtattatgatagaggttcacagagaaggggcacatgattcagatagttggaatagggttggaggaagaatgggaa  
agggtagtaacagctaacagttgccaagtgtcactctgtgtcagtgctgttctatgtgctttaaactatattaatttatttaact  
tcacagaaatcctacaaagttagattaccttcatattattaggtacagattaagtaataagagacatattcaggtaaatattgttccat  
gagcctttcttgaggtataaaagtcatttaagagatgatagtaaaaaggactatcagtgaaacaaagatttatataactgtgaacaaa  
aattaaaactaatggcagaattcgagttgaaaaacaaagtttaaatatggttatatgctcctgacaataaagaaaagttagaagtaaaaa  
ccaaataaacaacaaaggaaatggggataagtgtggagtgtaaaggaaatttgcctgattgctttattaagaaaagctgaaagtca  
aaaggtatcatttaagctaataaataaagtaatagaagcataagcagatttaacaatacaaaagataaatctgaaaaaagataatac  
tactgactaaaactgagtagaaggaaaggagtagcagagggcggccgcaggaaccctagtgatggagttggccactccctctctg  
cgcgctcgtcgtcactgaggccgggcgaccaaaaggtcggccgacggcgggcttggccggcgccctcagtgagcgagcgagcg  
cgcagctgcctgcag

### hCFTR\_intron\_7\_AAV donor DNA (From 5'ITR through 3'ITR): Targeted Integration intron 7

cctgcaggcagctgcgcgctcgctcgctcactgagggccgcccgggctcgggcgacctttggtcgcccggcctcagtgagcgagcga  
gcgcgcagagagggagtgcccaactccatcactaggggttccctgcggccgcacgcgtgggcaaaatataaactacagcatttctgta  
gcaatgagaccatttttctcagttgagctccatgttctacaaacttcaatcaaaaaaggttctaggagactcagtgaaagttgata  
cactgttcaaggaacaaataatcagcacatgggaattcacagggaaaaataactaaaaagagaggtaccattttggatggtgt  
caatatgggttatgaggaattcaggctgctgagttccagttaggatccctgacctcttcttctcccacagaacagaactgaagc  
ttaccgggaagggcctacgtgcggtacttcaacagcagcgccttcttcttctccggattcttctggtggttcccttccgtggtgc  
cttacgcgctcattaaggggatcatcctgcggaagattttcaccacgattttccttctgcatcgtgctgaggatggccgtgactcggc  
agttcccgtggcagtcacagctggtacgattccctgggcacatcaacaagattcaggacttccctgcagaagcaggagtagacaaga  
ccttggagtacaatctcactactactgaagtgttcatggagaactgaccgcattttgggaggaaggttccggagagttgtcgaaa  
aggccaagcagaacaacaacaagacactccaatggcgatgattcccttttcttctccaatttctcccttcttggcactccgg  
tgctcaaggatatcaatttcaaaaatcgaaacgcggacagctgctggcgggtggcgggatcgaccggagctggaagactagcctgctta  
tggtcatcatgggagaactggagccttccgagggaaaagattaagcactccggctcgcacagcttttgttcccaattttctggtgatta  
tgccgggaaccatcaagggaaaacattatcttccgggtgtcatacagcagtagcaccgataaccgacgcgtgatcaaggcctgccagctgg  
aggaggacatctcgaaattcgccgaaaaggacaacattgtcctggcgaaaggtggatcacctctcggcgagcagcgcgcgagaa  
tctccctggccgcgagctctacaaggtgccgatctgtacctcctggattccccgttcggctatctggacgtcctgaccgaaaagg  
aaattttcgagtcgtgctgcaagctcatggccaacaagaccgcacctcctcgtcaccctcgaagatggaacacctcaagaaggcag  
acaagatccttatcctgcacgagggctcctcctacttctacggaaccttctccgagctgcagaacctccagcccgatttcaagcagca  
agctgatgggtgcgacagcttccagcagttctcggccgaaagaagaactcgatttctgaccgaaacctcgatagatttccctgg  
agggggatgcgcccgtgctcctggaccgaaacgaagaagcagtcattcaagcaaacccggagagttcggcgaaaagcggaaaaactcga  
tccttaaccggattaactccatccgcaagttctcaattgtgcaaaaagacaccctgcaaatgaacggcatcgaagaggactccgcag  
aaccttggaaacggcggctgctcgtggtgcccagcagcagcagggagaagccatcctccccggatttccctgtagcagcactggcc  
cgactctgcaagcccggcgcagtcctgctgctgaacctgatgactcacagcgtgaaccaggggcagaacctccatcgcgaagacca  
ccgccagcaccagaaaggtgtcgtggtgcccacaaacctgactgagcttgacatctactcgcgccggctctctcaagaaaccg  
gtctggagatttcaagaagaattaacgaagaagatctgaaggaatgtttttcgcagataggagtaattccagctgtgactacct  
ggaacacctacttgcgctacattaccgtccacaaaatccttgatctttgtcctgatctggtgctcgtgattttcctggccgaaagtg  
ccgatcgtcgtcgtgctgtggttttggggaacacccccctgcaagacaaggggaacagcaccactcccggaacaattcttacg  
ctgtgattatcacctccacgagcagctactacgtgttctacatctacgtggcggtggccgatactcttctcgtatgggattcttcc  
gcggtctgcccgtggtgcatactctcatcaccgtgtccaagatcctgcaccacaagatgctgcactccgtcctgcaagcaccgatga  
gcacactcaacacctgaaggccggagggttcttaaccggttctccaaggacattgcaatcctggacgacctcctgccactgacca  
tcttcgattttatccagttgctgctcatcgtgattggagccatcgcagtggtggccgtgctgcagccctacatctcgtggcgactg  
tgccggatcagctggccttcatcatgttgcgggctacttccctgcaaaactagccaacagctgaagcagctggagtcggaaggaagat  
cgctatctttacgcatcttgtgacctccttgaagggctcgtggaccctcagagccttcggacggcagccttatttcgaaactctgt  
tccacaagccctgaatctgcacaccgcgaactggttccctctatctgtcagacctgcggtggtttcagatgaggatcgaatgatct  
tctgatcttctcctcagccgtcaccttcatctccatcctcaccaccggagaagcgaagcagcgtgggaatcctcctgacctgg  
cgatgaacatcatgtccactctgcaatggccgtcaactcctcgattgatgtgactctctgatcgttccctgtcaaggggtgttca  
agttcattgacatgccactgagggaaaaactaccaagtcactaaagccttacaagaacgggcagctgagcaaaagtcagattattg  
agaacagccacgtcaagaaggacgacatctggccttccggaggacagatgaccgtgaaggatttgaccgccaagtacactgagggag  
gaaacgcaatcctggagaacattagcttctccatctcgcctggccagcgcgtgggactgttgggcaggactggctccggcaaaaagca  
ccctcttgcggccttctcgcctcctgaataccgaaggagagatccagatcgatggggtgtcttgggactcaatcactctgcagc  
agtggcgcaaggcttttggcgtgattccgcagaaggtgttcatcttctcggggaccttccgcaagaacctcgacctctacgagcag  
ggtccgatcaggaatctggaaggtggccgacgaggtcggcctccgttccgtgatcagcaattccctggaaaaactggacttctgct  
tggtcgacggcggatgctgctgtcccacgggcacaaagcaactgatgtgcttgcgggagcgtgctcagcaaggccaagattcttc  
tgctggacgagccatccgcccacctggaccccgtagcctaccagatcatccggcgcaccctgaagcaggccttccgaggactgcacag  
tgattctgtgcgagcatcgcacgagatgctggagtgccagcagttcctggtcatcagaggagaacaaagtccggcaatacgcaga  
gcatccagaagctgctgaacgaacggctcgtgtttaggcaggccatctaccaagcagaccgcgtgaagctgttccccaccgcaaca  
gcagcaagtgcgaatcaagccgagattgcggcgttaaggagagactgaagaagaagtcacaagacaccaggctgtagctcagc  
tgtccttctagttgcaagccatctgttgttggccctcccccgcttctccttgacctggaaggtgcaactcccactgtccttct  
ctaataaaatgaggaattgcatcgcattgtctgagtaggtgtcattctattctgggggtgggggtggggcaggacagcaaggggga  
ggattgggaagacaatagcaggcatgctggggatgcgggtgggctctatccatggggatggtgtcaatatgggttatgcatgtacctg  
ggctggaaggaactgaattctggaactgagctgcaggtgtgtgattgtaaacaacaaaagaaatgctgaaatattaagtcctttgc  
catgaaatagaaaaagagattttatcccaaacattattgtcacctgtttttgttatgcctttcaagataaatccaggaaagga  
attgcattttcttccagaaaacaagttcttgggggaattgttcaattggtagatgttgttttctcattaacaagtgagtgctcca  
tcacacttgcagtgctccatcacacttgcggtaaaccagctgcggaccgagcggccgcaggaaccctagtgatggagttggccac  
tcctctctgcgctcgtcgtcactgagggccggcgaccaaaaggtcggccgacggccgggcttgcggggcggcctcagtgag  
cgagcagcgcgcagctgcctgcag

**hCFTR\_intron\_8\_AAV donor DNA (From 5'ITR through 3'ITR): Targeted Integration intron 8**

cctgcaggcagctgcgcgctcgctcgctcactgagggccgcccgggctcgggacgaccttgggtcgcccggcctcagtgagcgagcga  
gcgcgagagagggagtgggccaactccatcactaggggttctctgcgccgcacgcgtatttagacaaagtggatctagctctga  
atcatagtaagttagctctgggaatcatcttgtcttctgttagcccattgagagagaaatagagagagagagagagagaaagaa  
gaagaaacagatctgggagagtgactgaatgggagcatagagacagagaaacagatctagaaaaccaaactgggagaaaatgagag  
aaaccaaaaagagaggtagagaggagcagagaagaaaatgaagaagcaaggcaaggaccaggctttttcattatttcttatggccaag  
acttcagtatgctggacttaaggatccctgacctcttcttctcccacaggacttctgcagaagcaggagtagacaagaccttg  
agtacaatctcactactactgaagtggcatggagaacgtgaccgcattttgggaggaaggcttcggagagttgttcgaaaaggcca  
agcagaacaacaacaagaaacacagaaacaccccaatggcgatgattcccttttcttctccaatttctcccttcttggcactccggtgctca  
aggatatacaatttcaaaatcgaacgcygacagctgctggcgtggcgggacgaccggagctggaaagactagcctgcttatggca  
tcatgggagaactggagccttccgagggaaagattaaagcactccggtcgcacagcttttgttcccaatttctggtgattatgccc  
gaaccatcaaggaaaacattatcttgggggtgtcatacagcagtagccgataaccgcagcgtgatcaaggcctgccagctggaggag  
acatctcgaaaatcgccgaaaaggacaacattgtcctggcgaagggtggcatcaccctctcgggaggacagcgcgcgagaatctccc  
tggcccgcgagctctacaaggatgcccgatctgtacctctggattccccgttcggctatctggacgtcctgaccgaaaaggaaat  
tcgagtcgtgctctgcaagctcatggccaacaagaccgcatcctcgtcacctcgaagatggaacacctcaagaaggcagacaaga  
tcctatcctgcagagggctcctcctacttctacggaaccttctccgagctgcagaacctccagcccatttcagcagcaagctga  
tgggctgagcagcttcgaccagttctcggccgaaagaagaaactcgattctgaccgaaacctgcataagattctccctggagggg  
atgcgcccgtgtcctggaccgaaacgaagaagcagtcattcaagcaaacggagagttcggcgaaaagcggaaaaactcgtacctta  
accgattaactccatccgcaagttctcaattgtgcaaaaagacaccctgcaaatgaacggcatcgaagaggactccgacgaacctc  
tggaaaggcggctgtcgtggtgcccagcagcagcagggagaagccatcctccccggatttccgtgatcagcactggcccgactc  
tgaagcccggcggcagctccgtgctgaacctgatgactcacagcgtgaaccaggggcagaacatccatcgcaagaccaccgcca  
gcaccagaagggtgctgctggcggcccaagcaaacctgactgagcttgacatctactcgcggctctctcaagaacctggtctgg  
agatttcagaagaaatcaacgaagaagatctgaaggaatgttttctcagcagatggagtcgaatccagctgtgactacctggaaca  
cctacttgcgctacattaccgtccacaatccttgatcttctgctgatctggtgctcgtgatttctggccgaagtggccgcat  
cgctcgtcgtgctgtggcttttggggaacacccccctgcaagacaaggggaacagcaccactcccggaaacaattcttacgctgtga  
ttatcacctccacgagcagctactacgtgttctacatctacgtggcgtggccgatactcttctcgtatgggattcttccgcggtc  
tggcgtggtgcatactctcatcaccgttccaagatcctgcaccacaagatgctgcactccgtcctgcaagaccgatgagcacac  
tcaacacctgaaggccggagggttcttaaccggttctccaaggacattgcaatcctggacgacctcctgccactgacctcttcg  
atttatccaagttgctgctcaatcgtgattggagccatcgcagtggtggcgtgctgcagccctacatctcgtggcactgtgccc  
tcatcgtggccttcatcatgttggggcctacttctgcaaacatgccaacagctgaagcagctggagtcggaaggaagatcgcc  
tctttacgcatcttggacctcctgaagggctgtggaccctcagagccttcggacggcagccttatttcgaaaactctgtccaca  
aggccctgaatctgcacaccgcaactggttctctatctgtcagaccctgcggtggtttcagatgaggatcgaaaatgatcttctg  
tcttcttcatcgccgtcaccttcatctccatcctcaccaccggagaaggcgaaggacgcgtgggaatcatcctgacctggcgatga  
acatcatgtccactctgcaatggccgtcaactcctcagattgatgtggactctctgatgcttccgtgtcaaggggtgtcaagttca  
ttgacatgcccactgagggaaaacctaccagtcactaagccttacaagaacggcagctgagcaaaagctgattatgagaaca  
gccacgtcaagaaggacacatctggccttccggaggacagatgaccgtgaagatttgaccgcaagtagactgagggaggaacg  
caatcctggagaacattagcttctccatctcgcctggccagcgcgtgggactgttgggcaggactggctccggcaaaaagcaccctc  
tgtcggccttctcgcctcctgaataccgaaggagagatccagatcgatggggtgtcttgggactcaatcactctgcagcagtgcc  
gcaaggcttttggcgtgattccgcagaagggtgttcatcttctcggggaccttccgcaagaacctcgaccctacgagcagtggtccg  
atcaggaaatctggaagggtggccgacgaggtcggcctccgttccgtgatcagcaattccctggaaaactggacttctgctggtc  
acggcggatgctgctgtcccacgggcacaagcaactgatgtccttgcggagcgtgctcagcaaggccaagattcttctgctgg  
acgagccatccgcccacctggaccctgacctaccagatcatccggcgcacctgaaagcaggccttcgcggaactgcacagtgattc  
tgtgcgagcatcgcatcgaagcagatgctggagtgccagcagttcctggctatcgaggagaacaaagtccggcaatacagacagcatcc  
agaagctgctgaacgaacggctcgtgtttaggcaggccatctcaccgaagcagccgctgaaagctgttccccaccgcaacagcagca  
agtgcaaatcaaaaggcagattgcccgccttaaggaggagactgaagaagaagtccaagacaccaggctgtagctcagagctgtgcc  
ttctagttgcccagccatctgttgttggccctccccgtgccttcttgacctggaagggtgccactcccactgtcctttcctaata  
aatgaggaaaatgcatcgcattgtctgagtaggtgtcattctattctgggggtggggtgggagggagggaggggagggattg  
ggaagacaatagcagcattgctgagtaggtgtcattctattctgggggtggggtgggagggagggagggagggagggagggattg  
tgcttcaattctctttaggtataggaattcccttatgctcctaccttccctagggaaaactgatttggagctctaatagagccct  
cttttagaatcacagtttgatgccttaaaactagttatataccttccatgcttcttcaaccacagaagtgtatgataatgagggcc  
ttaataaggagcgtgctattaagatgaagacattcatttttttctccgtccaatgttggattaaggcacattagtggttaattcag  
ggttgccttggtaattcatcactaaggttagcatgtaatagtagcaaggaagaatcagttgtatgttaaatctaataaaaaagtt  
ttataaaatatacatatgttagagagatatttccgtaaccacgtgcggaccgagcggccgcaggaacctcagtgatggagttggc  
cactccctctcgcgctcgcctcactgagggccggcgaccaaaggtcggccgacgcccgggcttggccggcgccctcagtg  
gagcagcagcgcgcagctgcctgcagg



## Supplemental Materials and Methods

**Culture of airway basal cells:** CF and non-CF airway epithelial cells, coded as KK003K ( $\Delta F508/\Delta F508$  *CFTR*), KK002C ( $\Delta F508/R553X$  *CFTR*), KKD023N ( $G542X/R785X$  *CFTR*) and DD023J (non-CF), were obtained from the CF cell core facility at the University of North Carolina, NC, USA. Two culture media were used for airway basal cells culture in this study. One was Pneumacult™-Ex Plus (STEMCELL technologies, Vancouver, Canada) medium; the other was dual SMAD inhibition medium consisting of SAGM™ medium (Lonza, Basel, Switzerland) supplemented with 10  $\mu$ M RhoA kinase (ROCK) inhibitor Y27362 (Reagents Direct, Encinitas), 1  $\mu$ M A-8301 (R&D Systems, Minneapolis, MN), 1  $\mu$ M DMH-1 (R&D Systems) and 1  $\mu$ M CHIR99021 (R&D Systems)<sup>2</sup>. In both culture conditions, basal cells were cultured on pre-coated plates with laminin-enriched 804G cell-conditioned medium (804G-CM) and placed at 37 °C in humidified air with 5% CO<sub>2</sub>. When cells reached 50 to 70% confluence, they were dissociated with conventional trypsinization and either split at a 1:10 ratio or utilized for gene editing and *in vitro* differentiation. The 804G cell line, a rat bladder epithelial cell line kindly provided by Dr. Hongmei Mou (Massachusetts General Hospital, Boston, MA, USA), was cultured in RPMI-1640 (Sigma Aldrich, St. Louis, MO) supplemented with 10 % Fetal Bovine Serum (FBS) (GE healthcare, Chicago, IL) and 1 % Penicillin-Streptomycin (pen-strep) (Thermo Fisher Scientific, Waltham, MA). Once cells reached confluence in a 225 cm<sup>2</sup> culture flask (Corning, Corning, NY), culture supernatant was replaced with 100 ml fresh medium, and collected every other day for up to 3 collections. All media obtained were filter-sterilized and stored at 4 °C. Both basal cells and 804G cells were cryo-preserved in CryoStor® CS10 (STEMCELL Technologies) and kept frozen in liquid N<sub>2</sub>.

**Characterization of airway basal cells:** Airway basal cells were analyzed with cell surface markers CD49f and NGFR using flow cytometric analysis. Briefly, dissociated cells were stained with  $\alpha$ -CD49f-PE (Biolegend, San Diego, CA) and/or  $\alpha$ -CD271(NGFR)-APC (Biolegend) on ice for 30min. Non-immune IgG2a-PE and IgG1, as well as  $\kappa$ -APC were used as isotype controls. Antibody-stained cells were washed with FACS buffer (phosphate buffered saline with 1 % FBS), pelleted by a 5-minute centrifugation at 200g and then re-suspended with FACS buffer containing 0.075  $\mu$ g/ml 4',6-diamidino-2-phenylindole (DAPI) (Thermo Fisher Scientific) for live cell separation. Stained cells were analyzed on a FACS LSRII (BD Biosciences, San Jose, CA) using FACS Diva software (BD Biosciences).

***In vitro* differentiation of basal cells at air liquid interface (ALI):** 200,000 airway basal cells in Pneumacult™-Ex Plus medium were seeded on the top chamber of a 6.5 mm Transwell® with 0.4  $\mu$ m pore polyester membrane inserts (Corning) pre-coated with 804G-CM. Initially, medium was added to both the top and bottom chambers. The medium was replaced the following day by Pneumacult-ALI medium (STEMCELL Technologies). After an additional day, medium from the top chamber was removed to establish the ALI and cells were maintained, with daily feeding, in this manner for approximately 4 weeks.

**Histological and immunofluorescence analysis:** Well-differentiated airway epithelia at ALI were fixed at 4°C overnight in 4 % paraformaldehyde (PFA) (Electron Microscopy Sciences, Hatfield, PA). Fixed samples were dehydrated with a series of increasing concentrations of ethanol, cleared with xylene and infiltrated with paraffin before embedding in wax. Sections of 5  $\mu$ m thickness were transversely cut using an HM 325 Rotary Microtome (Thermo Fisher Scientific), followed by staining with haematoxylin and eosin. For immunofluorescence analysis, fixed cells were immunostained on transwell inserts to perform whole mount staining, or cryo-sectioned transversely to image airway epithelium. Cryo-section samples were prepared following sequential sucrose treatment (15 %, then 30 % sucrose), flash freezing in OCT embedding medium (Thermo Fisher Scientific), and sectioning (5-8  $\mu$ m thickness) using a Leica® CM1850 Cryostat (Leica Biosystems Inc., Buffalo Grove, IL). Whole inserts and sectioned samples were stained with primary/secondary antibodies listed in **Table S5** utilizing standard immunofluorescence procedures. Briefly, samples were permeabilized with 0.3 % Triton X-100 (Sigma) in PBS for 15-30 min and blocked with 2 % bovine serum albumin (BSA) for 1 hour. Samples were then incubated with primary antibodies in 2 % BSA overnight at 4 °C, followed by the incubation with the respective secondary antibodies in 2 % BSA at room temperature for one to two hours. Three 5 minute washes in PBS were performed after each antibody treatment. Prolong™ Gold Antifade Mountant with DAPI (Thermo Fisher Scientific) was added to counter-stain. Samples were then mounted and cured for 24 hours prior to imaging. Images were acquired using a Leica DMI8 microscope (Leica Microsystems, Wetzlar, Germany) and Leica Application Suite Software (Leica

Microsystems). Quantification of each epithelial cell type was performed by counting the number of cells staining for specific markers in three random 40x magnification fields. The frequency of each cell type was calculated relative to the total number of cells as determined by DAPI stained nuclei (approximately 450 cells total from three random fields). Statistical calculations in Figure S3 were performed using GraphPad Prism<sup>®</sup> v8.2.1 (GraphPad Software, San Diego, CA) and statistical significance was determined using Two-tailed paired t-test compared to control with 95% confidence interval.

**Gene editing reagents:** Zinc Finger Nucleases (ZFNs) targeting intron 7, intron 8, or the  $\Delta$ F508 mutant sequence of human *CFTR* were subcloned into individual vectors (pVAX-GEM) containing a T7 RNA polymerase promoter, a 5' UTR sequence derived from the *Xenopus* beta-globin gene, a 3' UTR containing the Woodchuck Hepatitis Virus Response Element (WPRE) sequence, and polyA tract. ZFN mRNAs were synthesized *in vitro* either commercially (TriLink BioTechnologies, San Diego, CA) with ARCA Cap modification or in house using the mMESSAGE mMACHINE T7 Ultra kit followed by the purification with a MEGAclear kit (Thermo Fisher Scientific).

An approximately 2 kb *wtCFTR* AAV-6 donor spanning exon 11 was prepared by PCR amplification of *wtCFTR* (1963bp) from DD023J (non-CF) genomic DNA utilizing PCR primers CFaav2kb Fw and R, cloning into an AAV-2 ITR-containing plasmid backbone (pAAV2-MCS; Cell Biolabs, San Diego, CA), and produced commercially (Vigene Biosciences, Inc., Rockville, MD). The partial *CFTR* cDNA intron 7 and intron 8 donor constructs contained a codon-optimized human partial *CFTR* cDNA, a splice acceptor sequence derived from human FIX, and the bovine growth hormone (bGH) poly adenylation sequence. These constructs, denoted *SA-CFTR<sub>8-27</sub>-pA* and *SA-CFTR<sub>9-27</sub>-pA*, were flanked by homology sequences of approximately 500-600 bp in total length from human *CFTR* introns 7 and 8, respectively. To simultaneously measure gene disruption (indels) and homology directed repair (HDR)-mediated TI alleles, AAV donor constructs also included a primer binding site (green arrows in **Figure 3A** for intron 8 targeting) followed by a TI-specific barcode (gray box in **Figure 3A** for intron 8 targeting) just upstream of the right homology arm. Recombinant AAV-2/6 vectors (comprised of AAV-2 ITRs and the AAV-6 capsid) carrying intron 7 and intron 8 partial *CFTR* cDNA donors were produced by triple transfection of HEK293 cells in 10-chamber CELLSTACK culture chambers (Corning), and purified by cesium chloride density gradient centrifugation followed by dialysis. Viral genome concentrations were measured by quantitative polymerase chain reaction (qPCR). The 200-mer single strand oligo DNA donor (ssDNA) was synthesized by Integrated DNA Technologies (IDT) (Coralville, IA). All donor DNA sequences are shown above (Donor DNA sequences).

**Gene editing:** Trypsin-dissociated airway basal cells were resuspended in 100 $\mu$ l BTXpress<sup>™</sup> solution (Harvard Apparatus, Holliston, MA) with ZFN mRNAs and electroporated in BTX<sup>™</sup> electroporation cuvettes (2mm gap, Harvard Apparatus) under Low Voltage (LV) conditions of 250 V for 5 ms, and 1 pulse using BTX<sup>™</sup> ECM 830 electroporation generator (Harvard Apparatus). The number of cells (2–5 x 10<sup>5</sup> cells per reaction) and ZFN mRNA amount (typically 2-3  $\mu$ g of each ZFN-L and ZFN-R mRNA per reaction) were optimized for each targeting site and strategy. The electroporated cell/ZFN mRNA solution was transferred into a 1.5 ml tube and immediately transduced with AAV-6 donor at a multiplicity of infection (MOI) optimized for each targeting site (typically 1-6 x 10<sup>6</sup> viral genomes per cell (vg/cell)) for 20 min. Cells, together with AAV-6 donor, were cultured overnight in Pneumacult<sup>™</sup>-Ex Plus medium on 804G CM-coated plates. Alternatively, sequence-specific correction of  $\Delta$ F508 mutation with ssDNA donor was performed via co-electroporation of 2  $\mu$ g each ZFN11 mRNA together with 10 - 30  $\mu$ g of 200-mer ssDNA donor. Co-electroporated cells were immediately plated in Pneumacult<sup>™</sup>-Ex Plus medium on 804G-CM-coated plates.

**Assessment of on-target genome modification:** Induction of on-target indels, sequence-specific correction, and targeted integration were assessed quantitatively through NGS deep sequencing on an Illumina platform. For assessing ZFN11-induced indels and  $\Delta$ F508 correction, genomic DNA (gDNA) from gene-edited cells was first PCR-amplified using primers CFi10aFw and CFi11aRv indicated as  $f_1$  and  $r_2$  in **Figure 2A**, respectively, in order to avoid sequencing of residual ssDNA oligo or episomal AAV-6 donor DNAs. Nested PCR amplification was subsequently performed using primers Ex11 Miseq-Fw and -Rv to prepare ~ 200 bp amplicons for paired-end deep sequencing on an Illumina MiSeq sequencer (Illumina, San Diego, CA).

In order to permit simultaneous NGS-mediated assessment of gene disruption (indels) and HDR-mediated TI alleles for the targeting of introns 7 and 8, AAV donor constructs also included a primer binding site followed by a TI-specific barcode just upstream of the right homology arm (highlighted in **Figure 3A** for intron 8 targeting, for example). Once amplified with a reverse primer (black arrows in **Figure 3A** for intron 8 targeting) which binds just downstream of the right homology arm within the genome, both wildtype and modified (indels and HDR-mediated TI) alleles were amplified simultaneously, and frequencies of each mode of gene modification were assessed via paired-end MiSeq sequencing. The system was designed such that no PCR bias occurs with amplification of the TI alleles vs. wildtype alleles since the PCR amplicon was the same length and base composition. Examples of sequencing data are uploaded in supplementary files (Intron 8 NGS.xlsx, Intron 7 NGS.xlsx). One TI-8 experiment in  $\Delta F508/\Delta F508$  cells, showing extremely low frequency of indels as well as TI-8, was excluded from further analysis and presentation – due to concern that the electroporation step on this occasion was not successful.

In some cases, as in **Figure S2**, sequence-specific correction of  $\Delta F508$  mutation was also assessed by the web based bioinformatics tool “Tracking of Insertions, DEletions and Recombination events” (TIDER) (<https://tider.deskgen.com/>)<sup>1</sup>. Briefly, genomic DNA from edited cells was amplified by PCR with primers CFi10aFw and CFi11aRv and Sanger sequenced with primer CF5 followed by TIDER analysis. The ‘guide sequence’ for the TIDER analysis was 5’- AATATCATTTGGTGTTTCCTA-3’; control and reference chromatogram for the analyses were sequences from genomic DNA of KK003K ( $\Delta F508/\Delta F508$  CFTR) and DD023J (non-CF), respectively. TI-8 was also assessed semi-quantitatively by PCR amplification of genomic DNA from edited cells with primers CF34f and CF35r, followed by digestion with Eco RI (**Figure S5B**). TI-7 was similarly analyzed by PCR amplification with primers CF36f and CF37r, followed by Eco RI digestion. Digested and undigested PCR product were resolved with a 3 % agarose gel.

**Southern blot analysis of edited cells:** 20 $\mu$ g of genomic DNAs (gDNAs) isolated with GentraPura gene Core A (Qiagen, Hilden, Germany) were digested overnight with Eco RI and purified by ethanol precipitation. The gDNAs were then resolved on 0.7 % agarose gel, transferred to a Nytran Super Charge membrane (GE Healthcare), and hybridized with [<sup>32</sup>P]-labeled probe. As probe, a 246 bp CFTR exon 8 fragment was synthesized (IDT) and labeled with [<sup>32</sup>P]dCTP using Prime-It II Random Primer Labeling kit (Agilent Technologies, Santa Clara, CA). Following hybridization, the membrane was washed, exposed to X-ray film, and scanned.

**CFTR RT-PCR:** Total RNA was isolated from ALI culture with the Nucleospin RNA XS kit (Macherey-Nagel Inc, Bethlehem, PA). cDNA synthesis was performed with the Improm-II Reverse Transcriptase oligo dT kit (Promega, Madison, WI) and RT-PCR were performed with Gotaq Hot Start polymerase (Promega). TI-8 cDNA samples were analyzed with PCR primer pairs 72CF-wt8f and 81CF-wt9r for the endogenous transcript and with primers 72CF-wt8f and 81CF-opt9r for the chimeric endogenous-transgene transcript. TI-7 cDNA samples were analyzed with primers 70CF-wt7f and 81CF-wt9r for the endogenous transcript and with primers 70CF-wt7f and 81CF-opt9r for the chimeric endogenous-transgene transcript.

**Western blot analysis of CFTR protein:** After thorough washing with PBS, ALI cultured cells were lysed with RIPA Lysis and Extraction Buffer (Thermo Fisher Scientific). Lysate was twice flash frozen and thawed, and centrifuged at 3000 x g for 10 min (4 °C) to obtain protein extracts. Sixty  $\mu$ g of protein was brought to a volume of 50  $\mu$ l with RIPA buffer, sample reducing agent (Thermo Fisher Scientific), and sample buffer (Thermo Fisher Scientific). Proteins were resolved by electrophoresis through a NuPAGE 7 % Tris-Acetate Protein Gel using SDS-PAGE methodology, transferred onto Hybond-C nitrocellulose transfer membrane (GE Healthcare), and blocked with 5 % non-fat dry milk in PBS (blocking buffer) at room temperature for 30 minutes. The blot membrane was incubated in blocking buffer overnight at 4 °C with anti-CFTR primary antibody A4 596 (Cystic Fibrosis Foundation Therapeutics), followed by 4 washing steps for 5 minutes each in 1xTBS containing 0.1 % Tween 20 and 0.25 % non-fat dry milk (washing buffer). Subsequently, the membrane was incubated for 1 hour at 4 °C in blocking buffer containing HRP-linked horse anti-mouse secondary antibody (Cell Signaling Technologies, Danvers, MA), followed by washing 4 times with washing buffer and chemiluminescent detection using Amersham

ECL Prime (GE Healthcare). As loading control, calnexin was probed and detected with anti-Calnexin polyclonal antibody (Abcam, Cambridge, United Kingdom) followed by secondary HRP goat anti rabbit IgG (Abcam).

**Ussing chamber analysis:** Ussing chamber experiments were performed on EasyMount Ussing Chamber Systems at voltage clamp mode, and Acquire & Analyze software (Physiologic Instruments) was employed to record and analyze data. Briefly, transwell inserts were mounted into chambers and bathed in low chloride Ringer's solution (1.2 mM NaCl, 140 mM Na-gluconate, 25 mM NaHCO<sub>3</sub>, 3.33 mM KH<sub>2</sub>PO<sub>4</sub>, 0.83 mM K<sub>2</sub>HPO<sub>4</sub>, 1.2mM CaCl<sub>2</sub>, 1.2 mM MgCl<sub>2</sub>, 10 mM glucose) at apical and Ringer's solution (120 mM NaCl, 25 mM NaHCO<sub>3</sub>, 3.33 mM KH<sub>2</sub>PO<sub>4</sub>, 0.83 mM K<sub>2</sub>HPO<sub>4</sub>, 1.2mM CaCl<sub>2</sub>, 1.2 mM MgCl<sub>2</sub>, 10 mM glucose) at basolateral side of monolayer. After base line is stabilized, 100 μM amiloride (Sigma) applied to both sides of the chamber to carry out complete inhibition of ENaC (Epithelial sodium channel). Subsequently, 10 μM forskolin (Sigma) were administered to stimulate chloride current. At the end of experiments, 10 μM CFTR inhibitor-172 (Sigma) employed at the apical side to specifically inhibit CFTR function following by 100 μM UTP at the apical side to assess the integrity of developed epithelium. The resulting change in short circuit current was calculated as  $\Delta I_{sc}$ . For some samples, ALI-cultured cells were pre-treated with 3 μM VX-809 and 1 μM VX-770 for 48 hour prior to Ussing chamber analysis to modulate CFTR expression and function. The data were expressed in mean±SD.

**Clonal isolation of TI-8 cells:** Single cell-derived clones were isolated from bulk TI-8 treated cells via limiting dilution utilizing a modified conditionally reprogrammed cell (CRC) method<sup>3,4</sup>. Briefly, bulk edited cells were dissociated with trypsin into single cells and diluted in CRC medium consisting of a 3:1(v/v) mixture of complete DMEM medium (DMEM high glucose containing 10% FBS, 2mM L-glutamine and 100U/ml Penicillin-Streptomycin) (Gibco) and F-12 Nutrient Mix (Gibco), 25 ng/ml hydrocortisone (Sigma), 0.125 ng/ml EGF (Invitrogen), 5 μg/ml insulin (Sigma), 250 ng/ml fungizone/amphotericin B (Fisher), 10 μg/ml Gentamicin (Gibco), 0.1 nM cholera toxin (Sigma) and 10 μM Y-27362 (Reagents Direct) and then plated by limiting dilution onto a feeder layer of irradiated NIH3T3 cells in a 96 well plate. Each well was monitored via inverted light microscopy for the appearance of a single colony per well. Each colony was further expanded in SMAD inhibition medium or in PneumaCult<sup>TM</sup> ExPlus medium.

**Quantification of TI-8 mRNA transcript composition:** Quantitative RT-PCR was performed on RNA isolated from single-cell derived clones of TI-8 edited airway basal cells that had been cultured under ALI conditions for 3 - 4 weeks. Quantitative RT-PCR was performed using the PowerUp<sup>TM</sup> SYBR<sup>TM</sup> Green Master Mix (Applied Biosystems, CA) on a 7900HT Fast Real-Time PCR System (Applied Biosystems). The endogenous *CFTR* transcript was amplified with primer pair: WTex8 qPCRf (E8 in **Figure S8D**) and WTex9-10 qPCRr (E9-10 in **Figure S8D**). The chimeric endogenous-transgenic *CFTR* transcript was detected with the primer pair: WTex8 qPCRf (E8) and optex9-10 qPCRr (T9-10 in **Figure S8D**). The standard curve for absolute quantification of *CFTR* transcript copy number was obtained from serial dilution of a 250 bp double stranded, synthesized DNA that contained either the endogenous exons 8, 9 and 10 or the endogenous exon 8 directly joined to codon optimized transgenic exons 9 and 10.

**Assessment of ZFN8 off-target genome modification and ZFN8 optimization:** The lead h*CFTR* intron 8 - targeted ZFN pair was subjected to unbiased identification of candidate off-target sites using methods similar to those previously described<sup>5</sup>. Briefly, K562 cells were electroporated with mRNA encoding the ZFNs as well as barcoded DNA oligonucleotides using the BTX ECM 830 electroporator to allow for unbiased identification of sites which had undergone double-stranded DNA cleavage and NHEJ-mediated integration of the DNA oligonucleotides. The top 32 loci containing integrated oligonucleotides was then subjected to a validation procedure in primary human basal airway epithelial cells. For each off-target site (designated "OT2" through "OT32"), an oligonucleotide primer pair was designed that enabled amplification of a 120-200 base pair (bp) fragment. Primers were also similarly designed for the intended target in *CFTR* (designated "OT1"). Primers designed against target loci were then screened for predicted amplification specificity by a genome-wide *in silico* PCR simulation. Optimal primer pairs emerging from this step were extended via appending of adapter sequences necessary for a second "barcode"

PCR to attach priming sites and barcodes for the MiSeq process. The ZFN design was optimized as described <sup>6</sup> in order to reduce the incidence of off-target indels, while still retaining recognition of the same intron 8 target sequence.

## REFERENCES

1. Brinkman, EK, Kousholt, AN, Harmsen, T, Leemans, C, Chen, T, Jonkers, J, and van Steensel, B (2018). Easy quantification of template-directed crispr/cas9 editing. *Nucleic Acids Res* 46, e58.
2. Mou, H, Vinarsky, V, Tata, PR, Brazauskas, K, Choi, SH, Crooke, AK, Zhang, B, Solomon, GM, Turner, B, Bihler, H, et al. (2016). Dual smad signaling inhibition enables long-term expansion of diverse epithelial basal cells. *Cell Stem Cell* 19, 217-231.
3. Ghosh, M, Ahmad, S, White, CW, and Reynolds, SD (2017). Transplantation of airway epithelial stem/progenitor cells: A future for cell-based therapy. *Am J Respir Cell Mol Biol* 56, 1-10.
4. Hayes, D, Jr., Kopp, BT, Hill, CL, Lallier, SW, Schwartz, CM, Tadesse, M, Alsudayri, A, and Reynolds, SD (2019). Cell therapy for cystic fibrosis lung disease: Regenerative basal cell amplification. *Stem Cells Transl Med* 8, 225-235.
5. Tsai, SQ, Zheng, Z, Nguyen, NT, Liebers, M, Topkar, VV, Thapar, V, Wyvekens, N, Khayter, C, Iafrate, AJ, Le, LP, et al. (2015). Guide-seq enables genome-wide profiling of off-target cleavage by crispr-cas nucleases. *Nat Biotechnol* 33, 187-197.
6. Miller, JC, Patil, DP, Xia, DF, Paine, CB, Fauser, F, Richards, HW, Shivak, DA, Bendana, YR, Hinkley, SJ, Scarlott, NA, et al. (2019). Enhancing gene editing specificity by attenuating DNA cleavage kinetics. *Nat Biotechnol* 37, 945-952.
